# Supplementary material for: Scaling the effects of ocean acidification on coral growth and coral–coral competition on coral community recovery
Source: PeerJ. 2021 Jul 13;9:e11608. doi: 10.7717/peerj.11608 (PMC8284307; doi:10.7717/peerj.11608)
Supplement: Supplemental Information 2 — Data measured and modelled Scaling the effects of ocean acidification on coral growth and coral–coral competition on coral community recovery to determine the relationship between coral cover and the average percent contact among coral colonies in each model cell. [file peerj-09-11608-s002.xlsx]

## Sheet: Fig. 1 data
Observed_cover	Observed_contact	Simulated_cover	Simulated_contact
0.26	0	0.236704	0
0.26	0	5.26426	0
0.26	0	2.67725	0
0.89	0	8.63055	5.35321
0.89	0	14.4855	54.5036
0.89	0	15.9462	28.5986
0.89	0	5.63353	7.24765
0.89	0	4.12927	9.94234
0.89	0	13.735	24.5164
0.89	0	4.36929	24.6959
0.89	39.6581	15.114	47.1621
0.89	40.1339	15.7932	60.3638
1.4	0	18.8881	24.9741
1.4	0	6.07131	8.67533
1.4	26.9189	24.3618	36.8783
1.4	31.8013	18.274	42.0495
1.4	0	17.2471	30.5878
1.4	0	12.3147	29.7507
1.4	0	25.4903	9.19086
1.4	0	12.4814	52.4315
1.4	0	24.5125	29.5886
1.4	0	17.6283	39.5597
1.4	0	8.70425	24.3675
1.4	0	19.6026	33.4169
1.4	0	20.7474	39.5659
1.4	0	30.3242	54.16
1.4	0	15.6707	22.4925
1.31	0	26.1954	38.843
1.31	0	23.3557	44.8846
1.31	16.5708	23.3675	44.0451
1.31	16.6594	27.5709	66.5413
1.31	0	30.318	27.495
1.31	0	17.3138	28.126
1.31	0	40.5375	60.536
1.31	0	0.637301	0
1.31	0	3.59429	18.7863
1.31	0	2.89422	0
1.31	0	9.12984	0
1.31	31.0115	2.79533	0
1.31	30.7312	4.23906	5.73224
1.31	17.153	2.77357	6.29879
1.31	22.4285	6.0081	13.2138
0.92	0	10.1518	26.0592
0.92	0	18.5906	11.921
0.92	0	16.0989	28.5001
0.92	0	9.08388	14.0142
0.92	0	13.0318	18.2869
0.92	0	7.19671	16.8925
0.92	0	20.0874	28.177
0.92	0	13.2364	26.2209
0.92	0	22.308	30.9472
0.41	0	18.6277	11.7984
0.41	0	15.6674	51.7522
0.41	0	14.2683	14.9927
0.41	0	21.8174	25.7727
0.41	0	32.9236	48.4401
0.41	0	21.3432	43.7946
0.41	0	22.889	38.4949
1.33	0	33.4172	57.1092
1.33	0	34.1492	42.4423
1.33	45.9553	22.6718	40.9616
1.33	20.6096	13.5736	30.7443
1.33	0	23.1082	48.5253
1.33	0	24.4117	41.316
1.33	0	23.736	51.0184
1.33	35.3517	27.9672	50.506
1.33	41.6144	21.5529	43.3473
1.33	0	14.354	38.027
1.33	0	10.2388	0
1.33	0	5.68278	0
1.55	0	0.228128	0
1.55	0	5.01258	0
1.55	0	7.04447	2.21218
1.55	13.9847	10.0516	3.89114
1.55	16.0577	3.50577	0
1.55	42.3872	7.57097	11.3556
1.55	23.0196	6.42611	0
1.55	0	32.5941	37.1432
1.55	0	11.9394	41.7179
1.55	0	8.02952	9.14318
1.55	0	12.9959	32.9124
1.55	0	10.1055	19.4952
2.79	0	22.0091	26.3295
2.79	23.9562	22.331	15.9664
2.79	19.5182	15.4009	28.3689
2.79	0	13.9098	33.9408
2.79	0	20.59	32.3057
2.79	0	14.9705	36.5853
2.79	0	17.9469	36.5489
2.79	0	24.7327	51.9884
2.79	0	18.425	35.5535
2.79	32.8672	32.8746	57.2363
2.79	28.4161	18.3289	39.5305
2.79	0	15.3914	31.3906
2.79	0	22.7458	33.7268
2.79	0	13.6348	22.3041
2.79	0	23.6437	38.5542
2.79	33.4091	44.0804	68.0478
2.79	33.2439	26.7806	56.732
2.79	0	34.6358	55.4655
2.79	0	23.4207	51.0343
2.79	0	44.4446	62.0383
2.79	0	4.41083	0
2.79	0	0.185438	0
1.88	0	1.4591	0
1.88	0	4.72058	0
1.88	0	2.55696	0
1.88	0	12.1008	0
1.88	0	6.11345	21.1704
1.88	0	3.46599	7.45846
1.88	0	10.8959	20.3569
1.88	0	10.6056	29.5102
1.88	0	10.9875	31.1171
1.88	0	10.5649	13.3899
1.88	38.3223	16.5475	25.9322
1.88	25.0183	15.8776	28.2378
1.88	0	11.0663	29.6976
1.88	0	11.7939	27.7322
1.32	0	8.65936	15.3366
1.32	0	23.9792	48.9707
1.32	0	24.0878	24.1127
1.32	0	20.3333	39.3296
1.32	0	24.087	34.9779
1.32	0	40.0252	46.8201
1.32	0	21.7355	25.9099
1.32	0	16.904	26.6423
1.32	0	21.9504	36.8249
1.32	0	26.4637	49.9249
1.32	23.3583	32.1631	46.971
1.32	25.6997	31.0878	54.8788
1.32	0	29.1499	39.5064
1.55	0	22.4881	35.0633
1.55	0	41.9494	50.0845
1.55	0	29.5569	28.7903
1.55	21.33	30.3873	52.0109
1.55	19.6375	31.7158	58.1869
1.55	27.314	0.515789	0
1.55	31.4324	0.558666	23.8681
1.55	0	1.12391	15.0932
1.55	0	5.39366	25.3973
1.55	0	5.57663	0
1.55	0	2.33932	0
1.55	0	4.15165	5.63317
1.55	0	6.03819	0
1.55	0	20.2253	29.4368
1.55	0	15.4297	18.5435
1.55	0	11.1181	21.1859
1.38	0	10.2765	30.0636
1.38	24.6357	10.912	6.88194
1.38	64.8017	22.9945	31.2828
1.38	31.162	12.2419	33.416
1.38	0	15.5309	30.0071
1.38	0	18.7453	51.8643
1.38	0	19.5624	42.4848
1.38	0	13.9525	16.7776
1.38	0	9.9914	19.5184
1.38	0	18.8276	28.818
1.38	0	19.9774	35.9943
1.38	0	20.0421	29.0785
1.38	0	10.1554	30.6377
1.66	19.7794	26.4032	21.2837
1.66	67.5458	15.9974	33.6314
1.66	27.1462	18.0886	37.3319
1.66	27.7786	13.7826	39.9637
1.66	34.4298	34.5187	51.7393
1.66	0	27.7258	44.2067
1.66	0	30.7007	37.4416
1.66	0	21.0811	48.3198
1.66	0	36.6462	50.2886
1.66	0	36.1506	48.9391
1.66	0	1.14939	0
1.66	0	0.890609	0
1.66	0	19.2838	40
1.66	0	4.21682	0
1.66	0	14.7907	0
1.66	0	2.42087	22.8571
1.66	0	10.0223	32.5021
1.66	0	15.0956	18.7797
0.59	0	8.72891	8.8626
0.59	0	9.98719	4.68323
0.59	0	37.7631	32.5053
0.59	0	16.9257	24.9493
0.59	0	14.2183	20.332
0.59	41.5344	9.55935	30.3127
0.59	38.217	14.0998	12.7831
0.59	0	29.5158	47.368
0.59	0	25.2145	46.0516
0.59	0	15.366	47.944
0.59	0	20.0051	41.7258
0.59	0	24.9285	43.7868
0.59	0	30.0504	37.0849
0.8	12.8113	13.36	26.453
0.8	12.7947	18.6865	37.5803
0.8	0	28.7746	45.0374
0.8	0	27.2457	43.3494
0.8	28.1675	29.5378	39.1256
0.8	49.5729	32.8097	44.4993
0.8	0	26.9969	46.4383
0.8	0	22.4837	30.0044
0.8	0	18.7279	28.0738
0.8	0	38.4774	63.4261
0.8	0	40.3523	56.8319
0.36	0	22.5323	35.607
0.36	0	32.525	52.96
0.36	0	0.695204	0
0.36	0	0.180218	0
0.36	0	0.26964	0
0.36	0	5.63894	0
1.36	0	4.27112	7.52676
1.36	0	13.7206	54.7205
1.36	0	5.93333	31.1308
1.36	0	2.29098	3.18437
1.36	0	2.91424	2.57199
1.36	0	14.5012	21.4876
1.36	0	18.98	4.91127
1.36	0	16.2546	31.8913
1.36	0	14.4808	17.2406
1.36	0	12.6482	22.1083
1.36	0	18.3546	46.0195
1.36	0	16.0093	33.8067
1.36	0	13.8978	23.892
0.79	0	14.5504	9.16916
0.79	0	23.4303	36.8482
0.79	0	22.8796	33.6856
0.79	0	22.2434	17.2614
0.79	0	12.932	41.7785
0.79	0	24.7409	36.0742
0.79	0	26.4824	48.2596
0.79	0	24.5301	45.337
0.79	34.9799	28.8424	37.0154
0.79	47.2747	11.9836	27.9604
0.79	0	39.0291	51.3972
0.79	0	33.2667	57.9301
0.79	0	35.4307	46.9614
1.76	0	31.1561	52.4523
1.76	0	30.8558	40.5707
1.76	0	30.2303	41.675
1.76	0	27.1542	48.3966
1.76	0	1.96576	0
1.76	15.1452	0.214611	0
1.76	31.2929	0.988629	0
1.76	19.9898	3.47613	3.34209
1.76	0	10.3405	14.1672
1.76	0	3.68644	16.1288
1.76	0	9.14409	4.1462
1.76	28.4531	4.54701	5.70782
1.76	27.6597	3.87266	2.04998
1.76	0	7.79509	8.32458
1.76	0	4.01187	24.3374
1.76	0	5.50368	12.8979
1.76	30.5941	10.4885	48.8347
1.76	16.5267	17.871	18.6449
1.76	0	10.2109	13.7715
1.76	0	6.3516	17.7562
1.76	0	16.2763	25.6916
1.76	0	8.40947	14.2815
0.7	0	12.998	42.7424
0.7	0	14.968	39.6429
0.7	17.7829	18.0971	42.4472
0.7	12.3576	14.4475	30.6961
0.7	0	19.3675	44.6523
0.7	0	12.4755	33.3545
0.7	0	20.4063	34.6407
0.7	0	32.9352	43.9598
0.7	0	16.8475	41.4957
0.7	0	36.3425	46.4074
0.7	0	37.7352	60.8761
0.7	0	27.7049	50.4398
0.7	15.2202	18.0236	46.1024
0.7	28.9684	35.5934	41.2324
0.7	9.64317	47.5943	58.9678
0.7	0	56.6709	65.5415
0.7	0	0.110035	0
0.7	0	3.29991	0
0.7	0	1.45334	0
1.63	0	1.34601	0
1.63	0	12.7338	8.37183
1.63	0	6.52956	15.6338
1.63	0	7.85993	12.3914
1.63	0	7.69975	28.74
1.63	0	8.75167	0
1.63	0	15.9907	27.2477
1.63	0	1.5492	5.65713
1.63	0	5.39048	8.59223
1.63	0	6.93842	11.0503
1.63	28.1669	3.61088	5.63994
1.63	26.3291	17.6931	32.6008
1.63	0	14.2384	26.5617
1.63	0	9.96164	21.2441
1.63	0	8.63558	21.4166
1.63	0	9.42043	29.2403
1.63	0	27.6384	33.16
2.34	0	21.1374	49.3597
2.34	0	35.5118	38.2759
2.34	0	14.5531	27.9383
2.34	21.7099	31.434	56.2109
2.34	20.8549	21.3033	29.2428
2.34	26.1901	15.4181	36.5071
2.34	27.0288	25.1012	51.8608
2.34	22.1201	21.3626	51.8254
2.34	0	14.7214	39.003
2.34	0	25.0338	42.6324
2.34	0	37.1717	56.3866
2.34	0	28.5368	50.5894
2.34	0	24.241	37.7201
2.34	31.905	38.6104	59.5016
2.34	69.3275	6.47794	0
2.34	30.2994	0.466943	0
2.34	25.1233	4.43196	14.779
2.34	24.2597	6.06115	0
2.34	0	10.1947	5.59176
2.34	19.3809	2.87394	23.7979
2.34	23.5167	2.10024	0
0.92	0	4.54027	5.69362
0.92	0	12.8102	11.8116
0.92	0	11.3922	25.9385
0.92	0	8.57845	20.1211
0.92	0	9.66288	30.4662
0.92	0	21.703	27.9565
0.92	0	16.8486	21.7332
0.92	0	12.2602	9.23334
0.92	0	18.063	32.8213
1.24	0	11.9554	21.4762
1.24	0	8.55115	24.6135
1.24	0	13.9428	37.7957
1.24	0	21.0697	41.5808
1.24	7.91993	21.6207	41.2688
1.24	7.02341	16.5212	31.5167
1.24	0	14.728	36.1334
1.24	0	21.723	37.1488
1.24	0	23.6609	39.6877
1.24	0	20.7734	49.5422
1.24	0	19.2283	20.8748
1.23	0	43.8646	50.0901
1.23	0	31.246	49.3452
1.23	19.9803	23.1151	47.6475
1.23	51.4947	22.5233	38.771
1.23	0	28.6012	46.3272
1.23	0	26.7428	37.7342
1.23	7.51313	39.2315	47.0518
1.23	7.86362	0.479397	0
1.23	0	1.68377	0
1.23	0	2.80462	6.37186
1.23	0	1.63025	0
1.23	0	1.9387	0
1.23	0	1.55266	8.46121
0.45	0	4.76194	20
0.45	0	14.5756	10.7719
0.45	0	9.33779	6.39073
0.45	0	7.80237	21.8641
0.45	0	10.004	5.90365
0.45	0	7.38581	8.99061
0.45	0	16.1643	15.3403
0.45	0	8.55645	7.86401
0.98	0	12.8204	24.2089
0.98	23.5715	12.1726	33.5965
0.98	39.8775	20.9063	34.2148
0.98	65.7217	7.41992	20.9748
0.98	43.9471	14.4642	36.6351
0.98	0	18.7797	9.54737
0.98	0	43.792	32.9448
0.98	0	26.4761	27.2762
0.98	18.7597	26.277	32.2566
0.98	25.4645	13.495	18.7358
0.98	0	13.5885	39.8252
0.98	0	14.8545	28.2119
0.98	0	17.1514	42.1243
0.98	0	27.2942	45.0579
0.98	0	35.3824	63.5317
0.74	0	34.3943	44.6232
0.74	26.0644	30.0071	63.7888
0.74	37.4823	20.3039	53.2605
0.74	24.0693	37.7249	60.8552
0.74	20.9529	39.3073	46.1177
0.74	25.7028	3.27018	20.8926
0.74	0	0.235287	0
0.74	0	0.933569	0
0.74	0	7.27897	13.8213
0.68	0	1.86586	0
0.68	0	3.85455	23.302
0.68	0	13.5566	26.7914
0.68	0	4.418	0
0.68	0	19.9475	28.0222
0.68	0	11.0984	33.2663
1.69	0	8.59085	10.1729
1.69	0	12.2982	14.1037
1.69	0	9.13276	7.39014
1.69	0	27.3438	14.3672
1.69	0	8.37307	14.7295
1.69	0	10.1415	21.1429
1.69	0	13.3882	50.9126
1.69	0	16.9424	30.0407
1.69	0	26.5592	55.6705
1.69	0	24.0874	38.3873
1.69	0	22.1381	46.0614
1.69	46.154	27.3432	29.7657
1.69	31.5353	20.0545	31.022
1.69	0	23.2545	33.0018
1.69	0	23.9561	34.1478
1.69	0	13.5344	31.725
1.69	0	18.96	43.6656
1.69	0	15.3488	30.5056
0.77	0	25.035	46.5729
0.77	0	36.6983	53.2044
0.77	0	28.0768	54.3411
0.77	0	31.7567	48.2372
0.77	0	28.6671	50.0457
0.77	0	32.8529	47.0692
0.77	0	0.707852	0
0.77	0	1.35478	0
0.77	0	2.15402	18.7096
2.21	0	1.03577	0
2.21	0	10.4982	0
2.21	24.7865	2.63909	0
2.21	39.9495	3.70144	0
2.21	5.27613	2.42359	16.2165
2.21	3.57591	4.38092	22.1808
2.21	0	4.44078	3.62729
2.21	0	15.5088	33.6809
2.21	0	13.0174	32.4266
2.21	0	12.8405	17.5966
2.21	0	17.2332	33.7139
2.21	0	3.81939	14.8953
2.21	0	16.316	25.7362
2.21	0	15.9599	33.722
2.21	0	11.7511	17.792
2.21	11.3983	23.2161	47.7417
2.21	12.7948	36.7428	39.0413
1.32	0	23.9028	27.9842
1.32	0	15.0865	26.9164
1.32	14.8455	38.8427	53.5633
1.32	15.2147	17.7342	34.0976
1.32	0	22.4724	38.3591
1.32	0	14.7889	38.0223
1.32	0	30.6643	42.7016
1.32	0	33.5783	47.9985
1.32	0	29.951	53.3902
1.32	0	16.3811	33.3493
0.57	0	24.2618	36.2226
0.57	0	25.5008	49.638
0.57	0	20.2133	26.3118
0.57	0	21.7115	38.0464
0.57	0	1.84142	0
0.46	0	1.26987	0
0.46	31.0364	4.24596	13.4554
0.46	34.0047	3.87049	0
0.46	44.7826	10.3229	24.0769
0.46	18.734	15.0755	0
0.46	0	6.73022	26.2148
0.32	0	2.76556	4.97594
0.32	0	18.0496	40.7021
0.32	0	12.0705	37.8399
0.32	0	16.7729	23.0282
7.54	0	15.0709	29.3237
7.54	0	7.28963	8.78085
7.54	0	4.62057	7.27384
7.54	0	15.3695	8.90921
7.54	43.6396	9.88412	29.0154
7.54	56.2175	10.8922	25.8264
7.54	32.0949	8.97463	18.0493
7.54	32.1308	24.6328	29.0985
7.54	20.5442	29.0199	37.4647
7.54	16.3851	24.0902	36.4372
7.54	37.4141	32.314	50.9309
7.54	37.8704	13.7447	36.5993
7.54	43.3797	35.501	51.3244
7.54	31.4873	11.0115	29.2606
7.54	41.736	17.6677	27.3599
7.54	31.2726	28.2468	39.1173
7.54	0	17.9822	39.7213
7.54	0	18.6018	30.1731
7.54	0	29.3203	60.003
7.54	0	27.1859	45.9735
7.54	16.9105	29.1638	44.6951
7.54	20.2506	27.7521	56.6716
10.98	0	29.2804	45.7184
10.98	18.5179	2.54766	0
10.98	22.8348	1.31947	0
10.98	13.4955	0.456346	0
10.98	38.7069	4.28969	0
10.98	87.1614	15.1356	6.4786
10.98	57.5639	13.3869	50.9804
10.98	17.8991	3.30493	5.60562
10.98	0	3.73008	16.3748
10.98	32.2837	13.3453	26.1351
10.98	49.8907	19.7963	44.6676
10.98	28.7522	5.45149	21.9324
10.98	36.5236	7.39411	22.9521
10.98	27.2018	12.6226	25.8791
10.98	22.7327	14.4659	43.4007
10.98	0	16.1783	22.3074
10.98	0	13.5995	31.4104
10.98	0	16.0894	22.0744
10.98	0	12.5206	25.8332
10.98	0	20.969	44.4552
10.98	0	14.7055	29.8699
10.98	24.8636	48.3826	57.6316
10.98	31.8569	24.2097	15.9387
6.9	0	18.0249	38.3688
6.9	0	31.4556	40.8579
6.9	20.2854	25.0348	37.0028
6.9	25.8957	32.9481	40.6534
6.9	0	31.5368	35.154
6.9	27.8855	26.7355	66.8561
6.9	36.8877	25.834	33.2553
6.9	0	23.7197	31.981
6.9	0	37.4525	53.488
6.9	17.9945	30.2483	51.6774
6.9	45.3984	49.5242	54.5973
6.9	0	24.685	40.5538
6.9	23.0003	1.73348	0
6.9	32.7927	1.5076	0
6.9	0	4.21446	0
6.9	20.1755	2.32599	0
6.9	9.53372	5.50845	26.6667
6.9	41.6829	1.84571	3.54953
6.9	25.2057	3.48799	5.56333
6.9	15.9033	3.77815	0
6.9	9.97082	4.52838	23.205
7.2	10.5013	11.7322	15.0401
7.2	9.55764	5.12913	17.6199
7.2	0	7.27483	24.6154
7.2	19.5234	24.3522	24.2668
7.2	23.512	7.46779	6.32055
7.2	0	16.3119	29.8399
7.2	0	13.1682	20.3685
7.2	0	9.69141	19.4402
7.2	0	19.1735	41.7363
7.2	0	6.24698	12.3747
7.2	0	7.31913	16.6884
7.2	33.054	10.7313	11.6102
7.2	39.5217	22.3415	29.3545
7.2	0	34.6879	50.0326
7.2	0	22.9782	30.3102
7.2	33.4893	22.845	42.3201
7.2	36.1642	27.0931	28.3967
3.87	0	26.0099	60.7587
3.87	0	29.1049	34.5488
3.87	33.758	27.8674	43.2633
3.87	25.9425	28.9933	45.2078
3.87	26.1894	25.7782	62.9713
3.87	41.351	24.5918	46.2497
3.87	23.108	30.4125	41.8565
3.87	6.63839	30.7886	55.6763
3.87	46.9063	0.239659	0
3.87	18.8698	2.12086	15.1843
3.87	22.3367	3.4143	16.4826
3.87	27.7434	1.65431	0
3.87	0	6.2156	5.91622
3.87	0	5.56947	2.40422
6.28	0	8.47623	20
6.28	24.3404	13.1557	25.0964
6.28	67.1052	9.24083	19.3954
6.28	47.8347	6.29066	6.46011
6.28	0	14.1333	22.3064
6.28	0	4.02053	31.9808
6.28	0	10.7968	12.3199
6.28	0	13.9458	29.3027
6.28	0	18.6723	36.842
6.28	0	16.5677	56.8113
6.28	0	10.1922	33.8499
6.28	34.6475	16.3292	28.2267
6.28	28.9886	16.4367	34.3414
10.06	29.629	22.7856	37.4554
10.06	17.0678	16.7869	16.2006
10.06	18.813	19.06	31.9544
10.06	58.3862	15.1454	41.7919
10.06	28.1478	18.7015	34.9526
10.06	38.7998	30.5071	37.7911
10.06	0	15.3383	35.8976
10.06	0	33.0668	55.6332
10.06	0	24.888	38.4721
10.06	19.4802	45.6093	66.7658
10.06	42.078	38.5977	65.4043
10.06	25.0682	25.6521	40.6571
10.06	34.1649	37.0731	46.0248
10.06	16.0432	15.2179	37.8503
10.06	16.7024	22.7842	47.1127
10.06	34.5951	0.828173	0
10.06	24.3622	4.3354	0
10.06	38.0954	1.12558	7.2727
10.06	17.6658	7.05786	10.7981
10.06	23.7388	8.62565	0
10.06	0	7.22251	44.2306
10.06	35.1653	13.0208	39.3208
10.06	40.8287	7.95502	24.7152
10.06	23.8388	1.48188	3.85842
10.06	0	11.3624	31.0518
10.06	0	12.7535	23.9423
10.06	0	11.8535	11.5816
13.98	0	8.06836	7.84917
13.98	0	18.8869	19.6699
13.98	36.9848	5.97624	19.6683
13.98	29.802	18.4418	19.7634
13.98	0	29.4726	40.4842
13.98	0	10.7059	29.9808
13.98	0	26.7276	33.1806
13.98	0	10.7025	35.3097
13.98	0	17.6161	39.424
13.98	0	16.5491	24.5738
13.98	27.4552	13.0056	16.9919
13.98	52.7984	19.3054	55.9449
13.98	25.7361	16.6263	39.8001
13.98	0	24.6739	37.5487
13.98	13.2825	14.7658	39.1006
13.98	28.5565	22.3102	40.036
13.98	31.4632	18.1635	42.2353
13.98	51.0131	39.6714	52.9632
13.98	33.9489	20.5398	40.2528
13.98	0	25.4158	37.214
13.98	0	33.096	57.0716
13.98	19.607	28.5255	45.1579
13.98	26.9534	7.41298	0
7.56	0	2.22393	0
7.56	16.594	4.20726	0
7.56	33.7106	2.46395	0
7.56	22.4789	3.98774	0
7.56	26.751	4.83395	13.1859
7.56	0	5.80379	18.2635
7.56	0	9.18263	14.9584
7.56	0	7.25669	12.27
7.56	6.18383	9.40291	8.38464
7.56	44.505	6.65381	4.41462
7.56	41.8184	13.7894	22.8072
7.56	25.0777	10.9554	6.824
7.56	0	26.2678	31.1537
7.56	0	11.4188	15.4286
7.56	31.2375	22.3972	17.8135
7.56	57.2634	13.4466	16.4287
7.56	0	14.0043	11.275
7.56	0	20.9513	35.2249
7.56	0	14.4126	32.1365
8.36	30.2505	20.3684	39.1221
8.36	32.0008	26.08	30.6236
8.36	0	29.5738	46.7791
8.36	19.0595	27.657	29.3928
8.36	38.9556	19.1003	37.5512
8.36	24.9067	30.2141	40.3203
8.36	23.2012	31.4715	41.297
8.36	31.4144	31.0125	52.2727
8.36	0	34.7027	64.3888
8.36	0	20.2845	30.931
8.36	0	30.8593	48.8086
8.36	0	25.1503	46.4262
8.36	0	18.6313	44.487
8.36	0	43.4192	50.985
8.36	41.7958	0.0807906	0
8.36	38.6818	1.6077	0
8.36	21.2714	4.614	15.8468
8.36	0	0.720659	13.8401
8.36	16.4199	0.386524	0
8.36	19.9751	5.6611	10.4121
23.4	0	4.57707	5.48119
23.4	0	6.23312	8.35688
23.4	0	9.16501	16.5171
23.4	0	7.16193	39.2283
23.4	0	2.80276	0
23.4	0	11.3824	16.7595
23.4	34.1212	14.4267	37.5248
23.4	25.5063	3.93564	13.1468
23.4	0	11.778	36.5183
23.4	32.0574	20.2009	29.7048
23.4	26.402	9.2615	22.3983
23.4	30.3793	10.8083	12.0566
23.4	25.9342	23.0213	42.7892
23.4	0	11.7667	30.0495
23.4	0	17.264	35.3862
23.4	40.0148	11.3188	20.0767
23.4	24.1394	26.7441	32.8673
32.32	24.0687	31.5932	52.1164
32.32	30.389	15.5055	29.0181
32.32	45.6372	13.5694	30.618
32.32	29.5828	24.9558	44.5361
32.32	12.9409	17.7946	38.2796
32.32	53.1917	21.0431	33.9823
32.32	33.5587	24.2656	30.7324
32.32	37.2983	24.8752	39.7243
32.32	19.997	34.2133	58.7233
32.32	0	56.5894	55.0371
32.32	0	30.0277	40.6164
32.32	0	0.309848	0
32.32	15.8177	1.43966	0
32.32	46.2953	10.1456	12.1636
32.32	30.1521	6.20233	6.93449
28.95	9.49548	7.80873	0
28.95	21.1997	10.1796	12.4387
28.95	0	8.09228	7.07128
28.95	33.4336	3.3611	0
28.95	28.7285	2.31561	8.71944
28.95	59.3466	15.6064	14.5455
28.95	51.4855	4.56745	11.6938
28.95	0	12.7954	28.5077
28.95	0	14.2495	27.1833
28.95	36.2272	11.9102	11.3097
28.95	40.0833	20.5506	30.3495
28.95	16.6703	10.9121	20.1688
28.95	0	10.8164	21.3713
28.95	6.00421	16.5425	34.3372
28.95	41.2915	29.2547	58.8864
28.95	30.2203	19.0507	35.8693
28.95	44.819	15.4554	10.3783
28.95	0	23.7017	29.8558
28.95	9.77633	13.2364	30.1024
28.95	17.1225	11.0703	27.506
24.29	15.6737	30.1467	50.5338
24.29	51.4797	19.8079	30.8992
24.29	25.5175	23.4851	40.1416
24.29	42.1131	15.4334	29.4058
24.29	37.6944	59.8357	62.9047
24.29	0	27.3975	42.1877
24.29	0	32.2295	44.896
24.29	0	16.63	30.1364
24.29	0	49.778	64.562
24.29	13.5595	28.2464	50.0684
24.29	36.273	5.34342	0
24.29	0	0.347835	0
24.29	32.0364	6.6683	0
24.29	31.8561	6.74122	42.4548
24.29	0	3.19726	6.11364
24.29	30.3026	3.72202	16.4809
24.29	13.5662	3.82109	0
12.86	23.1931	6.8609	20.0406
12.86	19.2525	6.92321	4.92211
12.86	31.2374	20.6059	38.9601
12.86	24.6676	7.70396	11.7684
12.86	0	21.0349	28.4791
12.86	23.4282	14.2164	26.3252
12.86	78.5357	20.1282	41.2137
12.86	40.3588	26.811	28.7377
12.86	31.3799	13.9018	21.2487
12.86	49.2537	11.0838	24.7359
12.86	0	23.081	29.3627
12.86	0	19.699	39.228
12.86	0	27.1912	39.7449
12.86	22.7383	18.5026	48.033
12.86	19.0867	38.1903	57.3599
14.44	33.1308	15.9737	43.7605
14.44	48.2592	34.6914	47.8219
14.44	74.1747	23.3247	38.2546
14.44	59.1072	21.6514	38.523
14.44	37.5108	33.84	51.1286
14.44	27.1801	26.4031	46.995
14.44	0	27.7563	53.9433
14.44	0	21.8788	42.6802
14.44	23.7363	17.4155	30.9339
14.44	43.3958	37.8567	49.1546
14.44	0	38.1971	47.455
14.44	17.3149	58.3819	68.3201
14.44	19.6152	4.23603	0
14.44	24.3666	0.443273	0
14.44	37.4861	10.1731	22.2518
32.99	0	1.65027	0
32.99	38.8696	11.9087	10.4611
32.99	48.152	21.0694	11.8966
32.99	53.0761	19.1877	23.9323
32.99	22.1803	6.03996	6.20502
32.99	0	10.0676	6.58414
32.99	0	15.5814	4.25787
32.99	36.1102	10.1467	6.98101
32.99	47.9988	5.48415	5.3259
32.99	48.8564	9.10567	22.0008
32.99	51.3557	3.68703	14.5819
32.99	0	16.5667	16.755
32.99	77.233	20.1969	49.9219
32.99	49.771	25.2502	31.9399
32.99	36.5894	24.4431	19.742
32.99	64.3697	27.9902	45.9573
32.99	25.1614	19.2329	32.2245
32.99	0	23.1953	28.5585
32.99	0	13.9254	19.0673
32.99	0	14.9171	12.1038
32.99	42.9769	23.9606	45.5797
32.99	63.1704	21.5845	30.3421
32.99	41.3036	32.2621	59.7791
32.99	21.5815	34.5876	58.8873
32.99	20.8383	25.7904	44.8845
32.99	69.0677	20.1352	45.2272
32.99	57.6574	29.1914	39.5827
32.99	53.7966	23.9104	28.3022
32.99	31.6731	41.3568	70.1868
37.78	18.3336	22.2391	32.151
37.78	44.5359	35.3487	48.5403
37.78	36.2854	0.32961	0
37.78	0	0.352207	0
37.78	20.9273	0.186561	0
37.78	29.5456	6.76247	0
37.78	0	5.52858	3.32987
37.78	0	2.60399	10.594
37.78	0	4.34446	5.75714
37.78	0	4.55572	23.1505
37.78	0	6.44886	10.4934
37.78	0	13.5644	9.77816
37.78	33.5737	10.2222	17.9258
37.78	33.9659	11.9892	13.2702
37.78	31.0345	7.27771	9.82814
37.78	70.9739	20.9772	42.2184
37.78	73.623	19.3586	32.6562
37.78	65.7717	15.3676	14.3945
37.78	65.7929	11.2007	47.27
37.78	57.4454	12.5797	11.3459
37.78	24.934	28.7434	55.3131
37.78	23.2062	31.094	47.8601
26.46	18.0365	22.1947	29.3024
26.46	34.2027	18.0774	29.4188
26.46	36.0303	24.9275	52.4467
26.46	0	38.373	66.3138
26.46	43.034	25.5733	30.9555
26.46	18.446	30.2202	61.9551
26.46	0	18.5329	32.4339
26.46	33.4449	26.6998	38.6045
26.46	66.8503	50.7228	58.9198
26.46	33.2263	21.2754	30.7176
26.46	76.753	29.2954	46.2248
26.46	41.1428	31.2123	49.9606
26.46	63.7894	27.5738	44.0474
26.46	17.89	50.4176	62.6763
26.46	26.876	6.96546	18.9903
26.46	30.226	9.4901	0
26.46	34.4493	0.764711	13.693
26.46	0	4.6914	0
26.46	38.1432	4.52179	0
26.46	29.9117	6.04804	25.9877
26.46	0	10.1558	10.1192
33.58	0	3.2956	0
33.58	0	4.9327	9.19722
33.58	24.7426	12.4326	32.3313
33.58	0	8.94328	19.048
33.58	70.2368	10.8898	20.1223
33.58	62.0993	22.4615	44.0488
33.58	99.7987	5.34165	9.32369
33.58	25.4845	14.4885	26.6788
33.58	40.0773	16.0359	27.9525
33.58	86.2113	18.8025	16.0844
33.58	0	20.7055	18.987
33.58	26.4852	9.88712	20.8546
33.58	18.3633	12.4106	21.6116
33.58	46.8803	17.5296	44.5597
33.58	30.8646	26.9307	49.6474
33.58	43.847	26.4532	39.2344
33.58	58.5334	20.4197	29.8551
33.58	62.4358	21.2726	47.0497
33.58	75.306	30.4445	50.5219
33.58	16.2138	30.2312	66.0737
33.58	0	38.5709	55.4517
43.02	28.5112	29.6253	37.7029
43.02	40.8304	29.5731	50.6617
43.02	38.759	38.7266	64.6984
43.02	42.4196	36.1436	60.8553
43.02	39.0846	47.9893	48.4072
43.02	62.557	31.382	66.7943
43.02	21.3881	2.47439	0
43.02	19.7647	9.09264	0
43.02	50.4682	2.29862	5.73818
43.02	58.1163	2.36705	0
43.02	36.7031	1.42417	7.78407
43.02	20.1676	3.97748	0
43.02	19.0967	9.58986	31.4216
43.02	25.9025	8.27868	4.16035
43.02	0	7.16064	3.92797
43.02	0	8.86053	31.323
43.02	23.9463	32.3905	16.6024
43.02	11.5505	13.1909	37.5584
62.04	35.6771	6.27209	17.5606
62.04	52.2834	11.7895	13.2605
62.04	72.9109	17.941	51.8522
62.04	66.5897	18.4615	26.0509
62.04	55.9598	10.7531	17.7075
62.04	63.7647	22.6557	64.0294
62.04	40.0945	15.1038	40.8503
62.04	40.7166	18.3325	22.4667
62.04	26.4886	13.6671	24.0928
62.04	66.0498	12.9507	19.697
62.04	63.8864	13.4189	37.2466
62.04	93.6971	29.6049	47.0383
62.04	52.561	20.456	34.6386
62.04	51.6051	26.0815	34.6116
62.04	86.4165	31.8627	48.523
62.04	54.3147	29.0818	43.7547
62.04	37.9306	28.6986	49.6459
62.04	56.7397	22.6018	52.1693
62.04	89.4876	36.9847	42.745
62.04	24.9912	33.7545	48.9155
62.04	0	51.8207	62.2478
62.04	0	27.0371	54.3142
52.57	0	2.80262	0
52.57	0	0.756666	0
52.57	0	0.46753	0
52.57	0	7.8538	43.9831
52.57	24.1445	3.03636	7.13064
52.57	36.7253	2.99762	22.8571
52.57	13.6746	7.88348	7.31885
52.57	33.6132	6.90859	7.9903
52.57	47.6677	15.4675	17.8479
52.57	64.8878	9.34405	32.8088
52.57	48.3861	22.0618	24.4803
52.57	79.3028	9.79012	32.1581
52.57	0	10.7728	19.8776
52.57	36.5566	14.1293	41.0887
52.57	62.6709	22.0975	20.9979
52.57	61.2973	34.486	42.9471
52.57	29.8282	18.7371	31.0251
52.57	92.6247	10.9166	13.5551
52.57	42.4985	20.4662	49.7189
52.57	29.866	19.4227	16.3694
44.3	0	22.2316	36.4008
44.3	52.5934	22.5325	31.3249
44.3	63.9283	19.8106	37.0617
44.3	71.5523	39.8556	57.625
44.3	63.3245	20.1283	40.9774
44.3	54.8161	17.0639	25.8229
44.3	5.3344	29.9053	49.6325
44.3	9.17941	25.0554	42.3852
44.3	0	21.3054	37.7937
44.3	0	32.2375	32.3011
44.3	0	24.6029	40.2887
44.3	37.2119	25.551	48.8466
44.3	33.3347	34.8215	51.289
44.3	9.36767	22.9412	32.5877
44.3	6.62529	0.47554	0
29.65	22.6247	5.74502	0
29.65	30.3224	6.74803	0
29.65	0	3.22563	32
29.65	0	10.0624	0
29.65	45.2065	17.4416	39.0179
29.65	34.8532	19.188	11.4565
29.65	46.8919	5.92148	11.2302
29.65	36.1337	9.18264	6.73798
29.65	41.2755	4.17869	4.55841
29.65	49.9285	4.08622	2.77598
29.65	55.1272	3.11939	5.05334
29.65	49.0994	15.4336	38.6816
29.65	29.2946	16.879	21.0198
29.65	46.1869	20.9254	47.7327
32.84	47.66	20.2689	31.7321
32.84	55.1493	21.186	32.1861
32.84	41.1392	29.0586	45.4015
32.84	70.0886	31.3542	56.0897
32.84	0	15.0676	23.4041
32.84	0	20.997	29.4337
32.84	0	15.4673	36.008
32.84	0	30.9586	54.6354
32.84	0	25.7469	34.7702
32.84	7.20805	14.8633	24.1163
32.84	29.668	19.9235	28.6526
32.84	38.8996	30.7296	62.9671
32.84	47.8214	25.78	49.4278
32.84	56.6093	21.4845	33.0763
32.84	40.2408	30.0329	55.5184
32.84	15.2206	25.9151	40.0618
53.27	18.625	26.0305	52.0664
53.27	87.1903	22.1641	33.9823
53.27	89.5442	23.9754	34.2918
53.27	55.6551	1.8373	0
53.27	59.436	4.85214	0
53.27	43.9599	9.58052	0
53.27	47.6019	5.71251	15.2155
53.27	67.8748	2.2411	32.2684
53.27	29.7073	2.64932	0
53.27	54.0886	5.34533	0
53.27	46.8641	13.9618	12.2565
53.27	25.0241	11.0646	17.8981
53.27	21.7581	10.9741	8.86833
53.27	4.46328	15.1669	43.2337
53.27	31.7406	13.6844	38.8262
53.27	53.8352	5.84685	8.68607
53.27	69.2269	6.90356	21.863
53.27	43.6843	19.4753	26.439
53.27	40.9113	19.8772	26.695
50.79	30.3265	23.1939	51.7692
50.79	76.1154	17.5362	25.5181
50.79	44.6503	22.0442	35.7838
50.79	27.7785	20.7599	42.5585
50.79	38.6309	20.8103	41.5554
50.79	102.527	20.7949	34.8997
50.79	43.8957	13.6217	23.475
50.79	96.5092	23.3973	35.1957
50.79	29.8062	15.6368	34.9286
50.79	75.0739	23.5203	36.6573
50.79	72.7481	18.1905	26.3536
50.79	66.5635	23.5676	46.98
50.79	20.1987	28.4622	47.1403
50.79	0	34.4935	54.0113
50.79	9.70029	20.378	48.5925
50.79	8.60813	38.9425	52.6422
50.79	17.4832	28.653	60.3068
50.79	20.3788	35.7594	56.6149
50.79	23.023	0.54069	0
47.08	24.4419	3.50087	0
47.08	30.5919	3.69669	0
47.08	19.5181	3.79712	0
47.08	44.5424	6.01267	17.4015
47.08	33.0366	4.33958	14.0462
47.08	59.2989	0.62271	0.173392
47.08	42.9685	11.4891	11.0981
47.08	41.4366	7.61143	32.4295
47.08	42.3323	8.18911	5.2763
47.08	32.9136	12.2427	10.2543
47.08	62.5814	7.30987	15.2818
47.08	41.9291	12.8875	9.54094
47.08	95.7746	10.3113	47.1783
47.08	10.3879	19.368	17.6373
47.08	52.6402	12.8232	27.2916
47.08	27.906	13.5464	13.695
47.08	40.3126	21.8618	49.4011
47.08	25.8706	6.80394	7.97924
47.08	0	20.4467	24.6083
58.63	25.9797	19.9955	24.4333
58.63	26.9822	19.6207	34.8499
58.63	17.2643	23.7214	30.7716
58.63	72.6138	32.6727	41.8203
58.63	30.2194	21.5404	41.4817
58.63	45.647	21.1033	39.4879
58.63	30.6672	26.3667	32.535
58.63	67.5941	19.4467	34.5115
58.63	95.4034	19.423	47.5462
58.63	53.0241	23.838	59.2687
58.63	73.4763	37.4857	52.9156
58.63	20.6844	28.2631	41.4835
58.63	16.7374	18.6561	45.6359
58.63	88.9352	19.7692	44.7755
58.63	28.2777	1.69676	0
58.63	33.9657	0.172983	0
58.63	71.4653	1.61739	0
58.63	44.3901	4.35893	9.05961
58.63	30.0291	2.94321	0
		4.20318	0
		5.04238	7.25359
		4.70941	0
		9.94988	39.1873
		6.05582	7.89261
		13.8058	13.6301
		8.46982	13.1807
		13.2135	2.07047
		6.86077	22.3602
		11.8764	20.1589
		19.1252	25.6829
		12.9602	17.7627
		18.1895	35.6229
		26.0787	46.8892
		9.82142	7.53629
		19.2588	37.4277
		18.643	14.346
		22.5631	46.1528
		18.3656	34.3979
		25.9336	41.2322
		17.3632	36.0883
		29.3561	54.0167
		28.52	45.0851
		30.7899	61.0036
		26.8293	59.0461
		23.91	44.2833
		45.4292	78.1208
		31.8722	48.6392
		41.0059	50.8207
		1.22369	0
		0.701777	0
		0.407536	0
		2.75162	0
		15.6686	6.94361
		8.35431	9.58483
		4.15226	7.71331
		7.35175	1.63201
		17.5003	28.3442
		19.9913	62.6101
		9.75355	19.5807
		17.4761	26.4196
		17.439	30.7438
		7.78204	22.1899
		15.2595	23.8011
		12.9424	15.1912
		22.1374	40.0553
		15.5804	51.5525
		24.8333	36.6337
		13.987	35.0233
		11.1095	29.3993
		19.1864	38.8765
		34.961	44.5113
		24.3129	39.6014
		28.9988	47.1077
		20.0509	45.8891
		30.3145	45.1076
		19.4382	36.6036
		18.6292	33.4649
		33.7938	49.7598
		26.1941	49.9603
		33.8691	43.171
		29.0414	50.4876
		28.5424	57.0151
		0.524606	0
		1.63638	0
		0.592501	0
		1.40667	0
		1.27493	0
		4.48826	5.24131
		11.3671	30.9318
		12.9426	31.354
		11.0024	20.8785
		5.53236	19.0885
		17.7998	24.1249
		10.2256	24.8524
		9.48303	3.35103
		18.9989	25.5671
		23.6441	47.3495
		25.056	36.8229
		12.7803	22.0725
		19.6113	39.3044
		11.5783	17.3834
		18.2327	23.7954
		22.2978	25.57
		10.1988	28.1729
		23.7237	26.6619
		13.594	30.167
		23.6241	36.6954
		22.8775	40.9564
		24.6482	33.7018
		35.5914	55.9948
		36.0241	41.4448
		22.443	35.8096
		13.9061	38.2934
		39.1056	62.3106
		23.8816	47.4679
		24.572	49.1949
		1.4813	0
		0.528271	0
		1.83497	0
		5.17179	12.8758
		6.43393	6.90408
		3.94013	9.19576
		13.615	23.1323
		4.51677	1.67756
		5.66935	5.92319
		7.22149	22.609
		13.8032	3.8159
		6.42958	13.2451
		12.0366	11.6143
		12.3749	23.4023
		17.4208	27.373
		24.993	32.2894
		18.6548	28.7972
		15.468	26.1097
		19.5776	35.1193
		17.6334	12.5864
		19.1638	17.1037
		14.071	27.8676
		27.9447	51.5334
		19.3109	37.4661
		23.3203	51.9087
		34.1999	58.1618
		16.0544	37.1714
		32.1715	57.4501
		30.7411	49.4448
		35.2906	45.1222
		29.199	49.5567
		24.7255	48.7719
		19.4957	37.6222
		33.919	46.9699
		5.00627	0
		1.90441	21.1346
		5.19862	0
		1.33031	13.5759
		7.32284	6.69279
		6.15992	5.15459
		4.54413	2.53127
		9.51366	30.3196
		18.1954	16
		11.268	13.3237
		9.90491	26.3685
		5.22405	7.35717
		13.857	35.3548
		4.99669	26.138
		21.0905	33.1338
		13.5723	22.7364
		16.5583	16.5746
		19.6032	19.4348
		8.2734	25.2722
		18.9958	17.2576
		18.5468	29.7737
		14.6812	29.8297
		16.8931	26.6469
		34.9429	44.6103
		26.0596	46.0915
		23.0944	35.1132
		29.6601	40.73
		27.1871	43.9698
		36.9835	51.2842
		21.8514	32.8246
		25.3063	48.2052
		34.1713	61.7432
		26.5023	63.4658
		19.6079	51.7657
		4.96267	0
		2.08052	0
		2.49955	0
		6.06697	0
		5.86062	4.08204
		10.2682	4.11046
		3.64712	16.7378
		3.83362	13.8799
		2.4938	8.19543
		5.9323	13.7722
		15.9877	23.0207
		26.9277	38.4661
		5.15416	21.3486
		13.7676	19.5329
		23.5149	32.1098
		19.9719	35.6883
		12.8854	19.1924
		10.2228	30.4613
		12.0257	21.0827
		10.5431	29.6598
		18.3317	37.9992
		21.4549	30.3482
		16.3047	41.5813
		17.934	40.4253
		31.1057	48.0099
		25.5622	59.8431
		17.6816	29.3369
		29.7996	34.102
		23.904	37.4336
		21.3451	43.2544
		16.1384	43.8568
		19.4484	46.0251
		32.6663	56.6519
		40.8863	46.9116
		0.556111	0
		3.9292	10.7554
		2.32649	0
		2.30769	0
		10.9421	0
		3.6929	20.6274
		5.49304	15.1417
		21.7011	14.0539
		2.96617	8.61682
		6.58658	3.45321
		9.81944	6.11963
		25.5346	24.7434
		10.9386	27.1985
		19.9518	8.50226
		21.3164	33.1499
		21.1355	54.5178
		18.4917	31.6378
		14.7838	25.3112
		17.1044	15.1761
		15.8695	34.698
		21.5677	25.4999
		17.6252	33.7454
		21.7487	38.8273
		14.2083	26.3817
		22.5716	41.4534
		31.5326	41.7454
		22.0192	36.7747
		27.2575	35.4856
		24.7778	55.3592
		32.8588	41.595
		21.0431	40.1556
		24.8629	49.9465
		57.2773	76.2792
		36.7099	54.4109
		1.47662	0
		2.77067	0
		14.0109	8.01125
		8.93615	7.38516
		2.72219	0
		8.57615	11.282
		9.931	15.1986
		3.97533	6.35377
		10.3446	5.96142
		2.8966	5.98773
		6.71699	21.9065
		19.8536	19.7349
		5.64743	21.9396
		4.2421	5.3204
		13.7408	23.4294
		16.4227	38.3418
		18.3849	18.0079
		36.8495	42.8016
		16.6531	37.628
		16.6971	34.3238
		7.64847	33.5493
		16.9383	51.6252
		25.4436	34.5597
		22.7853	48.0618
		21.6053	30.7481
		26.6236	31.4127
		31.3208	55.7456
		36.3503	56.5436
		26.2106	50.7937
		22.8788	58.4757
		19.8487	46.7878
		21.3378	39.0677
		23.7773	55.5626
		37.2418	58.21
		0.420676	0
		4.63935	0
		2.21781	0
		2.78489	0
		8.17003	0
		5.24952	19.8851
		15.1555	21.4284
		3.33104	3.77111
		3.17263	5.69574
		10.8603	4.54526
		8.38728	11.0837
		10.6811	24.6021
		9.07025	13.3267
		21.3895	44.0697
		11.5754	19.9826
		14.634	17.2731
		13.8378	15.8552
		12.0511	33.6182
		15.787	35.2544
		16.2431	41.9116
		21.2977	34.1715
		18.3438	19.6902
		20.0781	30.673
		19.9499	43.4625
		12.7305	24.8498
		27.0922	33.0747
		20.8055	32.7057
		24.4285	41.0054
		18.8871	35.8194
		27.5756	56.2485
		22.7987	50.333
		21.667	33.4975
		19.5483	39.0461
		33.2956	35.1482
		1.70321	0
		4.92621	0
		7.88294	15.1681
		1.35168	0
		6.04467	0
		1.03677	0
		3.67294	8.99953
		3.25235	18.6464
		6.77945	0
		8.84355	22.2479
		5.40237	6.03554
		10.3887	33.8793
		11.178	18.9943
		9.18452	18.8461
		13.2679	40.0395
		7.26829	22.8757
		10.1692	25.1116
		20.5709	38.3441
		29.7099	19.8644
		12.9448	27.2859
		20.1287	40.0691
		23.9637	42.7841
		19.7926	26.3991
		20.7402	23.0769
		22.9779	35.2034
		27.6272	30.2444
		34.7753	50.0125
		13.7705	14.1053
		22.4557	48.8622
		28.3587	50.1514
		37.1159	52.7385
		21.0169	45.7187
		37.7842	56.6147
		27.0676	52.7909
		2.93113	15.2079
		2.3431	0
		5.99353	57.2658
		2.46673	6.32961
		6.42597	3.73656
		8.37342	8.24686
		8.23742	12.7738
		13.2655	13.146
		7.90639	20.5821
		16.1949	19.9554
		4.2464	11.493
		20.5072	18.9512
		20.2697	46.6658
		10.4241	13.4075
		19.6299	51.0494
		9.03105	18.5847
		21.748	48.9976
		14.6336	27.0833
		16.0387	24.6775
		11.4484	34.3108
		17.9107	36.2792
		14.3162	41.3462
		12.0244	19.663
		36.6928	41.872
		32.6218	61.8226
		37.6319	57.4192
		22.9241	58.984
		27.4571	54.2336
		28.1352	31.2459
		26.2646	42.6398
		24.6792	44.9367
		41.9327	61.3171
		41.3244	56.3082
		31.9215	42.7085
		0.638262	0
		0.0968767	0
		0.717277	0
		2.82122	5.43186
		5.75852	0
		6.5417	0
		20.7943	32.9684
		17.2059	16.0806
		2.29042	7.06395
		11.4848	29.4056
		15.1808	8.31644
		5.76639	5.08555
		22.5705	44.3193
		9.70555	18.8277
		13.1811	33.3236
		10.9259	20.5497
		10.9097	30.773
		18.5009	40.4438
		18.0727	38.0412
		15.3146	20.2683
		9.12583	13.4589
		16.3681	30.2727
		19.4294	33.7358
		20.4125	16.6974
		15.6363	53.8343
		23.6834	31.4415
		17.1285	45.8388
		27.0819	44.3735
		23.1104	48.3275
		46.0574	66.1561
		31.9025	52.6296
		26.0602	37.5049
		23.0847	37.6796
		41.8505	42.7772
		0.826594	0
		2.3828	0
		0.751444	0
		11.7904	31.4281
		3.21865	10.0488
		3.59465	16.3486
		5.49549	19.252
		13.6477	0
		2.52566	17.0385
		9.28084	8.60667
		5.78436	7.53277
		8.86184	10.4907
		9.66404	28.5896
		9.06339	27.4239
		20.9862	25.703
		10.4408	19.3428
		23.5535	44.1996
		31.8788	41.3471
		27.6637	42.8013
		16.4585	33.5762
		15.952	24.2941
		22.4647	31.539
		16.5334	31.7525
		16.8288	44.5653
		11.4468	30.1207
		24.6681	39.1202
		20.3843	35.7478
		24.7359	51.6317
		20.6626	46.3078
		19.4011	27.1847
		29.3315	55.4608
		22.1395	45.3351
		23.5577	56.1124
		44.6331	50.2702
		0.369329	0
		0.29344	0
		1.33163	0
		11.7785	20.4914
		2.16107	5.3219
		5.02244	4.27338
		2.62154	0
		3.00039	0
		7.87449	12.2131
		6.25925	17.207
		17.6591	17.9846
		15.0188	15.6187
		13.7577	26.9556
		16.4577	30.5564
		16.2176	26.1075
		20.0471	27.1744
		18.2213	28.383
		21.1494	24.6296
		13.6204	14.2965
		15.0647	26.8093
		18.318	38.4087
		14.9837	37.9275
		28.0097	51.2413
		33.6251	29.5667
		32.4058	46.2095
		33.4367	53.4487
		31.1652	36.0246
		21.1986	48.1897
		19.7878	44.6444
		32.4647	65.7033
		25.1783	59.0359
		30.1469	48.7312
		34.0878	47.2187
		36.2167	51.8411
		1.99345	0
		0.975433	0
		1.09325	0
		2.95141	0
		3.74238	10.0264
		6.21613	12.244
		3.12325	0
		7.15201	11.8837
		11.297	15.2371
		9.59803	10.2295
		12.9421	32.7674
		15.8429	48.861
		13.0418	16.8653
		24.0196	16.7561
		12.8438	10.8462
		13.9102	24.9189
		17.2313	24.6276
		22.6753	24.3822
		8.79534	20.4662
		26.6187	35.3349
		26.3622	47.4206
		30.846	29.2353
		6.8659	15.7978
		30.3992	53.2121
		22.9456	47.634
		28.3499	43.1084
		17.6733	33.571
		15.1093	53.1294
		22.0038	33.9785
		47.6845	43.1289
		24.2727	39.3777
		25.8132	50.6167
		36.6094	57.8689
		24.18	51.9059
		1.78704	0
		2.15918	19.6795
		0.683865	27.282
		15.8321	53.212
		13.4522	35.9617
		7.2207	10.9245
		14.3034	4.52644
		6.53525	9.52522
		9.69761	11.0425
		6.95062	5.64329
		12.0789	32.1695
		10.8496	22.0456
		12.2894	16.632
		3.26015	12.6738
		15.0648	18.2008
		16.0327	19.1871
		16.7241	28.5779
		28.4705	28.2455
		20.4022	16.0134
		18.2713	19.2379
		10.3601	14.34
		9.30629	19.032
		29.0316	46.0763
		25.6295	45.7098
		16.9059	25.8233
		28.9207	60.8499
		12.9897	35.4054
		24.4064	46.1641
		32.3622	47.7279
		19.7153	51.5253
		26.2329	54.3133
		28.1845	59.5642
		36.82	63.7152
		21.3979	40.1581
		0.339851	0
		3.21223	0
		0.338489	0
		9.69043	0
		6.36136	11.5992
		6.37282	27.2516
		11.2593	25.7658
		7.38402	7.29634
		12.3773	36.2455
		17.1093	25.6535
		6.65395	11.156
		15.671	18.3716
		6.36361	4.62527
		24.5387	32.3916
		20.1823	27.7628
		19.5747	28.7013
		11.4173	16.0384
		21.1349	25.6654
		22.0581	21.1692
		27.8378	34.1525
		11.0346	33.3664
		12.4432	34.1016
		20.7521	14.3863
		14.6782	37.3731
		16.1171	48.1348
		30.8031	37.0405
		20.5411	33.9276
		32.1783	53.708
		20.6011	37.1029
		27.9681	48.3954
		16.7601	33.6532
		30.8332	44.0373
		46.1174	48.6647
		21.0667	40.4528
		0.442434	0
		0.220399	0
		0.355496	0
		8.62796	41.5514
		7.4159	9.77777
		5.89194	0
		2.78694	0
		8.52268	5.92582
		6.3838	4.39668
		6.78199	0
		12.1302	35.9176
		10.902	9.40903
		11.3039	25.8804
		7.3982	20.8516
		15.1135	38.3741
		9.05956	22.8748
		25.7486	41.6986
		13.8194	34.3528
		28.1805	46.5774
		20.9472	32.7226
		28.1666	49.1435
		21.4086	43.9688
		14.3606	30.9271
		21.1649	20.7259
		15.9445	23.0732
		16.5719	35.2364
		13.3877	23.1122
		28.2454	57.4882
		20.4494	43.9387
		25.5135	38.3328
		16.6215	35.6463
		25.6049	61.212
		31.4196	60.2025
		23.7679	56.9604
		3.87201	0
		2.60071	7.87084
		2.69948	0
		1.27503	12.0659
		6.93012	0
		2.62974	8.93685
		3.13698	3.82152
		5.48599	11.9925
		10.8593	35.7621
		14.3322	4.37432
		16.3972	33.459
		4.20216	6.58331
		18.6984	40.2039
		9.36526	13.5203
		19.9627	5.57181
		10.2298	20.0777
		5.01643	11.7898
		20.5749	41.7047
		15.1141	22.8029
		18.2274	30.249
		26.7045	41.9653
		25.0129	26.4445
		27.988	40.4199
		26.2032	53.0401
		37.5536	57.0692
		17.1206	30.9968
		23.8567	51.6501
		25.6885	52.4847
		32.3705	47.7943
		33.2533	55.6081
		33.6066	47.9303
		40.0259	51.179
		28.1729	45.6468
		32.2286	52.8714
		0.187881	0
		0.894212	0
		1.59436	0
		3.34592	7.34108
		7.25113	9.74118
		6.29495	4.2437
		2.34103	3.0433
		2.67376	21.1832
		10.7917	11.4326
		7.12688	40.3332
		7.28219	2.68873
		7.67113	13.4648
		11.0607	19.8463
		13.6008	15.9217
		18.477	29.2879
		20.0414	27.5721
		13.9949	34.4194
		17.8023	34.7213
		16.8357	42.9307
		34.42	50.5373
		19.5111	40.9286
		22.4266	50.3244
		8.13669	20.9598
		32.6519	55.8157
		28.4955	64.7605
		33.8574	35.337
		21.8815	40.8625
		32.395	46.4118
		32.8013	37.3523
		33.3153	31.1911
		25.9275	42.2595
		29.805	39.3073
		31.2468	42.7676
		32.3018	52.3954
		1.09383	0
		1.79151	0
		1.3417	0
		7.40395	41.9242
		1.37501	11.6283
		2.62495	3.34336
		8.40665	5.08695
		5.86429	53.1743
		5.55235	2.21795
		10.5854	27.1111
		5.14146	18.9601
		9.69046	26.9633
		8.56525	16.7328
		9.09463	27.186
		13.4776	15.5176
		9.53864	10.9022
		20.1734	25.1444
		10.3976	22.6928
		27.8633	35.9621
		10.4482	13.0482
		8.91441	26.221
		19.0895	33.5755
		16.7392	13.2165
		21.6895	44.7374
		28.6081	34.7958
		25.7274	42.0604
		23.3822	45.1335
		33.1506	50.0391
		27.7029	50.0205
		42.136	66.8094
		32.0147	46.4186
		25.4362	47.7212
		30.7261	46.3377
		34.4742	55.9702
		0.606237	0
		5.37617	0
		0.584402	0
		0.38925	0
		1.1844	0
		7.89653	0
		6.03467	8.13914
		6.4314	32.2622
		7.55572	12.4088
		9.31758	18.629
		9.94512	19.1286
		8.98866	24.1475
		13.929	24.8171
		12.6156	10.6217
		20.3325	40.6789
		10.3826	26.2663
		10.1677	30.7017
		21.3759	18.9372
		8.25679	13.409
		12.612	22.0617
		25.2449	60.0092
		25.1246	53.2471
		20.0122	38.1588
		9.63778	29.6144
		23.4908	48.8632
		17.197	28.1524
		24.0562	39.3019
		31.977	45.893
		13.483	38.9199
		31.2488	46.0928
		18.4766	28.4479
		28.6104	45.1451
		40.6287	66.3926
		29.886	53.7061
		0.696307	0
		0.528117	18.8516
		1.22791	5.73758
		10.7933	0
		2.69669	12.4893
		7.4332	0
		7.78979	9.48346
		8.93011	24.5365
		16.7832	36.6309
		6.15538	4.02512
		11.5037	14.7176
		10.8721	37.4534
		35.0916	59.4889
		5.92197	2.09653
		16.0203	15.9521
		21.4103	48.4559
		12.2668	22.5035
		29.8695	35.2946
		21.2863	37.0961
		21.975	33.0645
		25.8279	51.4422
		19.4518	40.3336
		30.9919	47.5864
		25.1731	42.2067
		27.2617	40.3154
		17.2452	24.2903
		19.9547	37.9014
		25.0991	40.1281
		48.76	60.5674
		22.3762	39.5282
		23.5483	40.4734
		45.7532	48.3925
		33.3799	55.1136
		28.743	62.5926
		5.61353	0
		0.383113	0
		3.5329	22.0721
		4.71362	0
		4.01083	0
		5.39553	5.50653
		5.12453	12.8918
		11.4916	8.27954
		2.92931	4.49237
		8.44386	3.96886
		12.5859	15.2098
		7.45431	25.3128
		23.1286	32.8421
		7.64903	10.3752
		5.95456	12.485
		21.6816	46.0631
		13.3457	35.7477
		33.4728	65.4527
		18.9817	38.4998
		14.1159	23.4056
		16.5797	29.5372
		12.3997	28.4752
		24.4136	47.7036
		13.2312	22.5018
		18.236	31.5923
		26.1692	44.1289
		38.5511	59.4861
		19.6515	35.0983
		41.1114	63.695
		20.4499	21.7724
		23.6815	44.6112
		15.4016	40.0228
		30.7259	57.4386
		31.0653	53.4841
		1.97917	0
		3.57751	22.6467
		4.05866	10.7665
		5.9218	12.0943
		3.62724	18.0626
		9.9441	28.8898
		10.4714	10.9833
		6.82221	16.0964
		4.54207	5.58774
		7.82116	17.0846
		17.2085	29.4028
		13.344	26.5034
		15.0596	24.9064
		11.0414	16.7363
		10.8533	18.8031
		7.32119	5.65595
		24.8518	22.9666
		17.2042	43.0853
		16.1336	17.9497
		14.4748	48.4581
		26.0718	39.903
		28.1222	31.1973
		22.9567	24.7346
		18.5937	43.9124
		13.1616	30.5783
		18.8277	53.1098
		33.892	44.6701
		27.4801	43.363
		18.2726	48.0612
		23.3602	38.9342
		35.5774	43.2799
		18.539	39.3932
		15.2089	31.3447
		35.2217	40.4569
		0.583973	0
		3.64846	0
		1.71253	0
		3.81388	0
		1.95994	8.75891
		8.57527	9.50872
		4.7751	12.323
		7.96631	23.2263
		14.863	22.541
		13.1414	34.9801
		7.8427	10.6142
		13.739	42.1772
		6.70718	16.4798
		10.1242	26.7221
		9.8424	18.2968
		11.8158	17.7129
		40.6797	47.6969
		8.43651	11.0103
		14.751	43.7616
		32.3928	37.4396
		19.6225	40.9301
		31.4658	46.336
		24.736	34.1635
		14.8992	34.7513
		22.5356	39.117
		27.4096	51.9646
		30.011	46.4052
		32.3888	49.7655
		24.6348	37.9788
		27.072	44.7658
		26.6539	49.4264
		27.3942	42.9993
		31.6483	44.2388
		39.0753	57.0392
		0.493551	0
		1.75036	0
		1.80767	0
		5.7067	0
		5.95943	13.6932
		12.0705	34.9999
		7.9217	0
		5.55597	12.0658
		9.68122	10.6126
		10.6974	10.7131
		12.3774	35.1907
		10.9796	15.8856
		16.2106	26.7823
		10.7955	36.6779
		10.8329	26.0058
		18.0588	32.0445
		11.7169	38.5842
		17.4771	31.1647
		13.4951	25.6441
		9.56813	16.5539
		16.0379	18.0596
		12.9875	34.6776
		20.7402	42.7185
		25.6484	32.0009
		17.0478	39.0104
		22.8658	36.6757
		35.0749	48.8762
		27.155	46.1403
		34.9374	54.321
		33.5265	42.3895
		32.7647	58.5693
		25.4018	45.3908
		18.3602	26.0921
		38.2457	68.5008
		9.35047	80
		0.71901	0
		0.477404	5.09526
		5.61442	0
		0.940409	0
		5.23559	5.558
		2.44093	7.95086
		15.3643	0
		9.9251	13.4405
		8.15517	15.3011
		15.1223	13.0369
		14.4924	18.1004
		14.1298	24.7044
		11.9272	40.7877
		2.96306	6.75003
		15.1141	27.008
		12.967	25.2747
		22.2056	41.7163
		23.5663	41.3919
		13.7257	24.7547
		24.9041	28.413
		18.5285	38.1121
		10.6091	28.3826
		36.5949	65.6756
		18.9197	42.6228
		23.6556	51.0572
		13.9708	44.1344
		24.9195	47.6041
		31.1299	42.297
		18.7529	44.574
		27.0839	61.0885
		33.002	52.4159
		33.9632	56.4209
		28.4137	57.8027
		0.747857	0
		6.60504	0
		3.24391	9.43904
		16.3059	0
		3.3701	11.7986
		5.47582	0
		7.10993	4.36891
		6.25007	0
		18.8093	33.3356
		4.70255	14.6339
		11.6285	2.24027
		14.7711	29.0182
		10.4086	15.4451
		11.8815	26.7554
		11.8285	46.2929
		13.0154	29.6953
		32.3702	46.3512
		19.019	41.2754
		15.1998	30.164
		33.1049	57.7043
		14.6405	14.5662
		13.3395	34.4272
		25.3324	52.1113
		30.7438	50.3745
		24.3657	42.2876
		33.0226	45.9592
		26.5359	45.0117
[truncated: 1,401 more rows]
