# Supplementary material for: Scaling the effects of ocean acidification on coral growth and coral–coral competition on coral community recovery
Source: PeerJ. 2021 Jul 13;9:e11608. doi: 10.7717/peerj.11608 (PMC8284307; doi:10.7717/peerj.11608)
Supplement: Supplemental Information 3 — Data collected from Scaling the effects of ocean acidification on coral growth and coral–coral competition on coral community recovery from Evensen & Edmunds (2016) to determine the relationships between coral colony planar growth (as a proportion of the mean growth rate under ambient conditions) and percent of the perimeter of a colony in contact with conspecifics and heterospecifics under ambient pCO2 conditions (~400 μatm) and under elevated pCO2 Scaling the effects of ocean acidification on coral growth and coral–coral competition on coral community recover relationships between coral colony planar growth (as a proportion of the mean growth rate under ambient pCO2 conditions) and percent of the perimeter of a colony in contact with conspecifics (b) and heterospecifics (c) under ambient pCO2 conditions (~400 μatm) and contact with conspecifics (d) and heterospecifics (e) under elevated pCO2 (~1,000 μatm). [file peerj-09-11608-s003.xlsx]

## Sheet: Fig_S2_growth_reduction_new
Percent_contact_with_conspecific	conspecific_ambient_CO2_linear_growth	conspecific_high_CO2_linear_growth	Percent_contact_with_heterospecific	heterospecific_ambient_CO2_linear_growth	heterospecific_high_CO2_linear_growth
0	1.42203	1.37817	0	1.42203	1.37817
0	1.19585	1.13674	0	1.19585	1.13674
0	0.936803	0.803651	0	0.936803	0.803651
0	0.833888	0.786885	0	0.833888	0.786885
0	0.824887	0.899776	0	0.824887	0.899776
0	0.786539	0.994784	0	0.786539	0.994784
21	0.921933	0.487891	21	0.363138	0.224665
21	1.21503	0.459948	21	0.315398	0.101155
21	0.452749	0.717586	21	0.348268	0.435917
21	0.471532	0.420268	21	0.631188	0.282787
21	1.2522	0.698025	21	0.839757	0.174367
21	1.28938	0.684613	21	1.35551	0.342027
65	0.746234	0.272727	60	0.322442	0.0597988
65	1.03933	0.419709	60	0.442575	0.0279434
65	0.571708	0.6712	60	0.601057	-0.00558867
65	0.440618	0.839978	60	0.509098	0.139717
65	0.516924	0.65611	60	0.0152612	-0.061984
65	0.766973	0.529806	60	0.261788	0.101155
