# Supplementary material for: Scaling the effects of ocean acidification on coral growth and coral–coral competition on coral community recovery
Source: PeerJ. 2021 Jul 13;9:e11608. doi: 10.7717/peerj.11608 (PMC8284307; doi:10.7717/peerj.11608)
Supplement: Supplemental Information 4 — Measured and simulated total coral cover over 7 years (2010-2016) Scaling the effects of ocean acidification on coral growth and coral–coral competition on coral community recovery under ambient conditions, with the effects of OA on coral growth alone, and with the effects of OA on both coral growth and coral competition. [file peerj-09-11608-s004.xlsx]

## Sheet: Fig. 3a data
Observed coral cover in photoquadrats
Year	Measured cover
2010	0.5	0	0	0.5	0.5	1	0	0	0	0	0	0	0	0	0	0	0	0	0	0.5	0	2.6	0	1.5	0.5	0	0	0	1	0	0	0	0	0	0.5	0.5	1.5	1.5
2011	0	0	0	0	0	0	0	1	0	0.5	0	0	0	0	0	0	0	1.1	0	0	1	0	0	0	0	0	0	0.5	0.5	0	0	0	0	0.6	0	0	0	0.6
2012	1.1	2.3	3.7	0.5	0	2.7	6.5	3.8	6.5	6	2.7	2.1	1.6	2.2	2.6	0.5	0	6.3	1.7	3.2	1.6	1.6	5.9	5.2	4.8	1	2.3	2.6	2.3	1.1	4.3	3.2	3.6	6	2.1	1.7	2.1	1.2
2013	15.5	20	15.3	6.5	10.8	11.6	14.8	28.6	11.1	23.4	11.4	13.3	12.5	11.8	10	0.6	5.6	14	8.7	11.2	10.6	6.4	16.8	14.6	11.4	11.2	11.2	8.9	13.9	7.5	14.6	24.1	18.3	17	9.6	2.7	7.8	10.3
2014	36.2	48.3	42.3	33.7	14.7	29	35.3	49.2	30	42	35.9	29.4	34.2	36.7	24.8	9.8	10	37	26.6	28	26.1	14.8	43.3	33.1	28.9	28.9	24.1	23	31.4	19	25.5	36.6	28.9	38.8	22.3	13.4	24	31
2015	60.8	73.1	62.5	54.2	42.6	51.9	58.9	56.8	58.6	66.9	51	60.1	54.5	52.7	47.1	9.6	35.6	54.8	67.4	56.4	44.4	47.9	62.8	64	63.5	44.3	44.7	51.4	41.8	43.7	51.3	55.8	58.4	30.2	23.4	40.1	48.1
2016	76.5	87.2	87	76.8	67.3	56.7	78.5	69	64.2	81.9	66.5	79.4	61.7	71.2	67.9	3.4	52.1	68.6	81.5	70.8	57.8	80	48	72.7	83.5	67.2	69.6	66.5	58.2	57.4	65.7	69.5	64	57.8	44.6	61.2	52
Simulated coral cover under ambient pCO2 (blue)
Year	Simulated cover
2010	0	0	0	0	0	0	0	0	0	0	0	0	0	0	0	0	0	0	0	0	0	0	0	0	0	0	0	0	0	0	0	0	0	0	0	0	0	0	0	0	0	0	0	0	0	0	0	0	0
2011	2.58973	2.9117	1.67803	2.87	1.65168	2.50902	2.68637	1.74782	2.4068	2.3996	2.9526	2.13693	2.58215	2.9623	2.50922	2.19605	2.57605	2.48835	1.94312	2.80302	2.28348	2.08027	1.64488	2.35585	1.5418	1.50693	2.35775	2.79657	2.21318	2.8016	2.00995	2.95602	2.3622	2.58427	2.4511	2.3688	2.1102	2.34247	1.9777	2.06045	2.5182	1.86217	2.87715	1.92348	1.33858	2.41703	1.61627	2.20625	2.24345
2012	9.90232	10.6951	8.0964	11.2805	7.92253	11.0224	9.92432	9.01923	10.3981	9.4734	10.9493	9.33917	9.9316	11.0049	11.3072	9.1475	10.1286	10.5245	7.95427	10.8677	10.3294	8.56222	7.33132	10.5316	6.78808	7.67015	10.0699	11.5651	9.88247	11.225	9.29707	11.4611	8.90783	10.2804	10.5748	9.06545	8.65532	8.71552	8.48532	8.59845	9.9966	9.29325	10.6089	9.53107	7.98557	8.97692	8.16273	9.39252	9.03685
2013	21.4803	22.0624	18.3092	23.4365	18.798	23.6914	20.9936	21.3602	23.0476	20.8415	23.0697	21.0731	21.7518	22.3473	24.9914	19.8345	22.1322	22.3124	18.0136	22.2232	22.8907	20.0212	17.5696	23.0057	16.2316	18.5822	22.6471	24.499	22.1185	23.7397	20.3508	23.4758	19.7207	22.3922	23.6284	19.6441	19.9884	18.6787	19.3738	19.047	21.7103	21.4083	22.1311	21.5119	19.5462	19.7455	19.9833	20.8603	20.9552
2014	36.2721	35.6571	31.2018	38.0144	33.2535	38.7218	34.7428	36.8623	39.2651	35.2054	38.2234	36.6485	36.7723	35.5158	41.2801	33.1907	36.6882	36.4404	30.6275	36.2492	37.8597	34.652	30.9742	38.0061	28.5681	32.1466	37.914	39.7565	37.5719	38.4725	33.6719	37.3467	33.5338	37.1826	39.6616	33.1437	33.8781	31.4002	33.1463	32.3356	36.7612	36.1135	35.5665	35.4148	33.8828	33.4765	35.5766	35.0823	35.7759
2015	52.6895	50.5979	46.0818	53.9293	50.0711	55.2314	49.8301	53.9073	56.4687	50.9976	55.0742	54.4705	52.6652	49.6942	58.4953	47.7008	52.3745	51.9563	44.6991	52.1375	54.3456	51.1841	45.4884	54.4965	41.969	47.3478	54.7897	55.956	54.6042	54.4452	48.022	52.0752	48.6724	53.6382	56.9868	48.2391	49.4026	46.3593	48.573	47.0887	52.9111	52.3024	49.8513	49.8265	50.0876	48.7602	52.8927	50.4378	52.4286
2016	69.1292	65.6614	61.6923	69.7998	67.5118	71.5595	65.4547	71.1133	73.1753	67.5112	71.8727	72.8169	68.8695	63.8539	75.3027	62.5759	67.9308	67.6854	59.4509	68.079	70.9685	67.81	59.8235	70.6999	56.5233	63.6624	71.2815	72.4682	71.1771	70.8501	62.907	66.9512	64.1505	70.0548	73.5469	63.755	65.3072	61.7457	64.032	61.6703	69.5842	68.4044	64.1653	64.4176	66.8356	64.0671	70.2868	65.4983	69.2309
Simulated coral cover under OA affecting coral growth only (orange)
Year	Simulated cover
2010	0	0	0	0	0	0	0	0	0	0	0	0	0	0	0	0	0	0	0	0	0	0	0	0	0	0	0	0	0	0	0	0	0	0	0	0	0	0	0	0	0	0	0	0	0	0	0	0	0
2011	1.50657	1.20455	1.25228	1.52665	0.976175	1.49645	1.70425	1.8921	1.08505	1.51913	0.902	1.21768	1.4393	1.44748	1.44225	1.26848	1.36165	1.54608	1.37675	0.91545	1.49683	0.792675	1.2636	1.67885	1.72588	1.47443	1.41142	1.31852	1.4181	1.50323	0.766275	1.48667	1.351	1.07252	0.888475	0.8048	0.970975	1.55255	1.56255	1.01137	1.23425	1.29505	1.22863	1.39807	1.53335	1.47035	0.589025	0.7699	0.94605
2012	6.3255	4.8713	5.57223	6.75497	5.0633	5.93893	6.97995	7.85783	5.41585	6.48667	3.8754	5.50753	5.92457	5.598	5.80315	5.9544	5.31445	6.2053	5.60032	4.38875	5.77337	3.73853	5.98345	6.36017	7.04638	5.96415	5.08185	4.99822	5.1823	6.31195	4.33525	5.93548	5.5344	5.32963	4.5895	4.19503	4.47215	6.34945	6.41747	5.25073	5.04312	5.58587	5.05678	6.1336	6.3503	5.53688	2.88652	3.96643	4.3099
2013	13.7795	11.2388	13.2568	15.3573	12.3232	12.7121	15.2707	16.913	13.161	14.8058	9.48725	12.7473	13.3721	12.7476	13.014	13.7638	12.4301	13.8321	13.0114	10.7411	12.8121	9.5972	14.0423	13.9417	14.9753	13.197	11.2567	11.3797	11.7105	14.2523	10.9098	13.6904	12.7067	12.6929	11.6082	10.3896	10.8379	13.8495	14.2358	12.4608	11.7299	12.8575	11.5129	14.0464	14.76	12.177	7.75913	10.1951	10.4602
2014	23.1447	19.2869	22.4291	25.4215	21.5634	21.8083	25.2331	27.8191	23.2814	24.7972	16.6354	21.6757	22.5742	21.8411	22.0203	22.6624	21.694	23.2074	22.5948	18.7113	21.5454	17.8025	24.1069	23.5743	24.3188	21.9845	19.0506	19.5655	20.431	23.9105	19.5155	23.3483	21.54	21.9103	20.5161	18.4607	19.5871	22.9103	23.9554	21.0556	20.4645	22.2637	19.9332	24.0452	25.1278	20.4321	15.0445	18.2685	19.2684
2015	33.3521	27.7499	32.744	36.4863	31.905	32.102	35.8293	39.0411	34.5933	35.707	24.9449	31.9727	32.8272	32.0905	32.3263	32.2404	32.6135	33.4056	33.3736	27.6515	30.9581	28.0817	35.0073	34.4635	34.5311	31.5133	27.5996	29.2694	30.3443	34.4252	29.0909	33.7734	31.3209	32.3107	30.3116	27.4513	29.8339	33.3297	34.9956	30.5323	30.3964	33.1244	29.6107	34.8214	36.4588	29.4081	24.2102	27.2626	29.856
2016	44.0024	37.0729	42.8968	48.246	43.1796	43.2955	47.0055	50.5135	46.1694	46.6852	34.2336	43.1595	43.3964	42.7134	43.2902	42.2279	44.2666	44.3182	44.6591	37.4224	41.1207	39.5196	46.2093	45.4287	45.2192	41.8049	36.344	39.0533	40.716	45.4612	38.8767	44.4804	41.3597	42.9509	41.0275	37.8446	40.4504	43.9322	46.4675	40.9753	41.0254	44.3708	40.3394	46.2138	48.0604	38.8059	34.0272	36.9052	41.292
Simulated coral cover under OA affecting coral growth and competition (red)
Year	Simulated cover
2010	0	0	0	0	0	0	0	0	0	0	0	0	0	0	0	0	0	0	0	0	0	0	0	0	0	0	0	0	0	0	0	0	0	0	0	0	0	0	0	0	0	0	0	0	0	0	0	0	0
2011	1.49398	0.5146	1.78117	1.71037	1.5896	1.52675	1.12872	1.37623	1.04297	1.1845	1.345	1.35482	1.06125	1.2386	1.56917	1.6117	0.873125	1.4349	0.755425	1.64013	1.52242	1.4648	1.4242	0.80925	1.20913	0.7791	0.595625	1.5799	0.669675	1.52628	1.13935	1.21637	1.23303	1.5291	0.612275	1.41593	1.75903	1.16855	0.9391	1.33603	1.90207	1.47192	1.01632	1.38357	1.0688	1.27915	1.7032	1.13738	1.29255
2012	5.6449	2.73018	6.2798	6.1822	6.13595	5.3205	4.82885	4.99815	4.38595	5.1427	4.94468	4.884	4.5494	4.83563	5.8096	5.44803	4.12685	4.99857	3.7019	6.18077	5.82105	5.29232	5.75622	3.39792	4.8214	3.51087	2.8443	5.93055	3.38987	6.02855	4.09462	5.01318	4.1444	5.86787	3.30317	4.7562	5.81653	4.49975	4.63392	5.4101	6.5079	5.75113	4.17225	4.85215	4.36177	5.22325	6.34622	4.4192	5.30138
2013	11.0328	6.84082	12.0057	11.4298	12.3036	10.7156	10.0891	9.84328	9.4447	10.9136	10.3136	9.59947	9.9398	10.0097	11.3716	10.5441	9.11393	9.50418	8.80118	11.9232	11.4556	10.4008	11.8722	7.7394	10.1236	7.91895	7.18765	11.614	8.0989	12.097	8.5718	10.6962	8.32258	11.7502	7.9539	9.24943	10.9543	9.03505	10.1085	10.6194	12.3021	11.4992	8.55562	9.6658	9.28185	10.8497	12.4066	9.02903	10.8599
2014	16.931	11.8096	18.1007	16.7882	19.2782	16.8326	16.0002	15.0351	15.3442	17.8127	16.4983	15.0465	15.9359	16.3089	17.4703	16.2105	14.7482	14.3752	14.6431	17.9069	17.7467	15.985	19.044	12.6898	15.8808	13.0655	12.2973	17.6738	13.7895	18.6686	13.6916	17.107	13.2065	18.4441	13.2808	14.1323	16.3487	14.0869	16.0682	15.7671	18.5842	17.9558	13.3625	15.2345	15.0208	16.9828	18.7605	14.3125	17.1949
2015	22.9574	17.0748	24.7284	22.3252	26.6038	23.2965	22.4763	20.8029	21.8617	25.5437	23.3282	20.8275	22.5449	23.6836	24.0894	22.3938	20.8033	19.5236	21.0964	24.3319	24.3363	21.9473	26.6928	18.2768	22.2288	18.8159	17.4877	24.0651	20.1262	25.5929	19.7381	24.3207	18.8038	25.6703	19.0666	19.2216	22.2439	19.3891	22.1749	21.0294	24.8273	24.8801	18.418	21.337	21.1784	23.8495	25.6514	20.1881	24.154
2016	29.6251	22.5765	31.8161	28.1416	34.5095	30.2163	29.6563	26.8982	28.9879	34.0404	30.5393	27.334	29.6592	31.5891	31.4036	29.2317	27.0004	25.0899	27.9304	30.6874	31.536	28.5038	34.8732	24.2179	29.023	25.0996	22.9002	30.8422	27.0629	33.1268	26.5739	32.291	25.4024	33.371	25.2568	24.781	28.6207	25.64	28.7261	26.3132	31.5649	32.4389	24.0026	27.9776	27.9927	31.375	32.926	26.5413	31.8137
[truncated: 51 more columns]
