# Supplementary material for: Scaling the effects of ocean acidification on coral growth and coral–coral competition on coral community recovery
Source: PeerJ. 2021 Jul 13;9:e11608. doi: 10.7717/peerj.11608 (PMC8284307; doi:10.7717/peerj.11608)
Supplement: Supplemental Information 5 — Scaling the effects of ocean acidification on coral growth and coral–coral competition on coral community recovery Measured and simulated cover of each coral genus after the 7-year recovery period (in 2016). [file peerj-09-11608-s005.xlsx]

## Sheet: Sheet 1
Observed cover (black)					Simulated coral cover under ambient pCO2 (blue)					Simulated coral cover under OA affecting coral growth only (orange)					Simulated coral cover under OA affecting coral growth and competition (red)
Year	Acropora	Montipora	Pocillopora	Porites	Year	Acropora	Montipora	Pocillopora	Porites	Year	Acropora	Montipora	Pocillopora	Porites	Year	Acropora	Montipora	Pocillopora	Porites
2016	1.1	10.6	55.3	9.5	2016	4.7086	19.1122	30.6967	3.079	2016	2.0802	6.3082	24.4514	6.0324	2016	0.4763	3.4402	23.1622	2.5464
2016	2.6	6.9	76.7	1	2016	2.7393	16.8464	49.8146	1.9329	2016	3.1323	5.0865	29.6489	6.8127	2016	0.7236	3.6609	15.7476	2.4444
2016	1.8	8.2	72.9	4.1	2016	2.9841	12.4962	39.7127	4.3973	2016	0.8214	4.4109	33.5573	4.4973	2016	1.6145	1.6896	26.2096	2.3024
2016	0	11.6	63.4	1.8	2016	1.7533	10.4428	54.488	2.7445	2016	0.717	6.1113	23.9581	6.975	2016	0.5551	3.085	21.7869	2.7146
2016	0	14.8	48.8	3.7	2016	3.7455	7.023	37.7671	3.0234	2016	0.8583	4.1283	35.5146	6.8383	2016	1.1856	1.2678	30.2667	1.7894
2016	8.5	9.8	32.9	5.5	2016	3.3493	15.7887	32.4114	3.0395	2016	1.5416	3.9097	32.7027	6.6339	2016	0.683	2.6899	24.9302	1.9133
2016	2.3	11.6	64	0.6	2016	1.7812	12.2709	43.7319	5.3021	2016	1.5771	6.6662	30.498	6.0203	2016	0.8285	1.4509	25.4245	1.9524
2016	1.8	3.6	60	3.6	2016	5.4687	11.8074	42.8759	3.7379	2016	1.2049	7.0472	30.1043	6.1912	2016	1.2501	1.9791	21.2485	2.4205
2016	6	4.9	49.5	3.8	2016	2.0053	12.086	40.4955	4.08	2016	1.7752	3.4659	32.5103	3.8718	2016	0.919	1.643	23.7822	2.6438
2016	10.5	4.7	66.7	0	2016	1.8424	11.8445	49.858	3.0606	2016	1.2595	5.149	31.2757	6.1222	2016	0.7116	0.8958	30.8532	1.5798
2016	15	4.2	46.1	1.2	2016	4.7922	7.5167	57.1838	3.4236	2016	1.4512	2.2477	39.2447	5.1256	2016	0.7476	2.5279	25.0908	2.173
2016	10.3	19.4	47.3	2.4	2016	1.7682	13.7399	45.0075	3.5032	2016	1.9223	3.5376	20.7359	7.6235	2016	0.5599	2.9407	22.0109	1.8224
2016	6.2	12.3	36.4	6.8	2016	2.2332	7.3571	53.8164	3.6517	2016	1.2831	2.9149	38.9	4.8862	2016	0.553	1.1773	24.192	3.7369
2016	0	8.6	55.2	7.4	2016	3.5013	8.3193	56.6745	3.6331	2016	1.2938	6.0264	26.58	5.6579	2016	0.5646	1.456	27.5324	2.0361
2016	1.8	8.8	53.2	4.1	2016	3.0137	6.7862	50.5206	5.5235	2016	1.425	3.842	30.8814	4.1011	2016	0.6105	2.0643	26.8954	1.8335
2016	0	0	3.4	0	2016	4.1216	14.1238	39.8173	3.7442	2016	1.7233	5.2332	24.0539	7.7004	2016	0.4421	1.8611	24.1191	2.8094
2016	1.8	4.2	43.1	3	2016	3.03	13.1421	50.3443	2.6578	2016	1.0514	3.0366	33.1204	5.1033	2016	1.4481	1.7732	19.5687	4.2105
2016	2.5	5.7	57.9	2.5	2016	3.5762	7.2387	60.0579	2.029	2016	1.1475	3.7933	37.3464	4.5298	2016	0.4229	3.0026	16.8704	4.794
2016	0	21.4	57.1	3	2016	2.8213	12.7823	44.579	4.1774	2016	0.731	5.6738	36.7146	4.2828	2016	1.1272	1.7832	23.2736	1.7465
2016	3.7	2.5	64.6	0	2016	7.2592	18.1604	33.2005	2.2822	2016	1.9526	4.2876	32.6478	6.5878	2016	1.0074	2.4961	24.0029	3.181
2016	3	7.8	38	9	2016	3.9537	15.2377	41.0407	3.6446	2016	1.4355	6.3729	28.9167	6.4107	2016	0.7618	2.9436	26.488	1.3426
2016	0	32.9	43.5	3.6	2016	4.5794	13.9778	35.5058	3.4142	2016	1.8463	3.9084	34.2336	5.8498	2016	0.8974	1.3212	22.7343	3.5508
2016	0	4.7	39.2	4.1	2016	2.1557	7.3549	50.3177	4.3654	2016	2.5655	4.6972	31.793	4.62	2016	0.5236	1.3284	31.0536	1.9676
2016	3.5	4.1	63.9	1.2	2016	2.1626	16.4172	49.1046	3.694	2016	1.698	4.4806	33.4314	5.3818	2016	0.7438	2.0767	17.5232	3.8742
2016	0	18.2	61.2	4.1	2016	3.4621	12.9298	57.317	2.6061	2016	0.4842	7.6356	29.4139	5.086	2016	0.5685	1.9636	24.7371	1.7538
2016	3.5	9.4	52	2.3	2016	1.0776	8.5396	59.3395	4.6926	2016	1.6187	4.7305	33.7493	6.1495	2016	1.3298	1.4581	19.0525	3.2592
2016	6.5	21.4	39.9	1.8	2016	1.8946	15.6662	45.3967	3.1287	2016	3.6486	2.8045	21.2537	9.2649	2016	0.8702	1.4877	16.4413	4.101
2016	0	14.4	49.1	3	2016	1.1007	16.0218	43.3078	3.4994	2016	0.9328	5.4347	35.5738	5.2368	2016	0.7052	4.1401	23.9726	2.0243
2016	0	13.1	40.6	4.5	2016	3.3534	5.6879	52.1215	5.7159	2016	1.7498	4.2565	33.8654	7.3292	2016	0.8098	1.5676	22.1193	2.5661
2016	0.6	21.6	31.5	3.7	2016	1.8644	7.9447	47.8404	4.7082	2016	1.372	6.4453	28.8881	4.397	2016	0.2802	2.0727	28.6389	2.135
2016	0	15.2	48.3	2.2	2016	3.0502	7.4823	58.4345	4.2326	2016	1.1568	5.0748	32.5265	5.7134	2016	0.5195	1.6608	22.3023	2.0913
2016	0	5.4	59.9	4.2	2016	2.9192	4.2576	62.8012	3.9131	2016	1.0734	3.9892	25.445	8.4985	2016	0.5426	0.5357	30.1455	1.0671
2016	2.3	10.5	50	1.2	2016	1.6039	5.4572	59.0746	2.7052	2016	1.3212	6.812	23.2864	6.265	2016	0.8958	0.7449	20.6332	3.1285
2016	0	6	51.8	0	2016	2.1191	8.1333	43.87	3.7156	2016	1.8188	3.5674	28.4924	6.6481	2016	0.3248	1.6719	28.685	2.6894
2016	0	3.7	39.1	1.8	2016	3.1369	7.301	37.0661	3.7886	2016	1.0444	3.8207	28.7957	6.5575	2016	0.6371	2.6094	18.4732	3.5371
2016	8.2	10	36.5	6.5	2016	2.9832	11.853	43.7585	4.7222	2016	1.4788	4.3475	30.4106	7.1711	2016	0.7712	2.8469	18.3212	2.8417
2016	0	0.6	43.5	7.9	2016	1.832	16.1048	47.1851	2.9492	2016	2.3685	2.8991	31.6004	6.2714	2016	0.6804	2.9879	22.4668	2.4855
					2016	1.4564	14.7282	51.3578	3.1456	2016	0.5533	7.2347	24.7651	7.7249	2016	0.6436	2.2245	19.2309	3.541
					2016	2.1208	7.7073	62.5472	1.6231	2016	1.4822	4.7236	22.461	6.7077	2016	1.1188	2.3628	22.6404	2.604
					2016	3.0898	7.7507	54.7157	2.6884	2016	1.8834	3.1018	33.3113	5.9336	2016	0.7727	3.691	17.8912	3.9583
					2016	3.8988	7.7139	52.459	2.8972	2016	1.7375	7.9951	31.3172	3.9811	2016	0.7212	3.0356	25.5056	2.3024
					2016	4.089	13.9835	37.9922	4.7197	2016	2.2609	5.5629	30.9166	6.8611	2016	0.3458	2.4496	27.8547	1.7889
					2016	2.46	8.9625	44.18	5.163	2016	2.3634	3.6898	24.1873	7.4707	2016	1.1833	2.9359	16.0538	3.8297
					2016	3.1601	6.5333	53.3308	2.741	2016	1.4108	4.27	35.971	3.7321	2016	1.2974	2.9891	22.1164	1.5747
					2016	3.6213	8.0233	44.4875	3.8335	2016	1.2354	4.9345	27.2897	9.0381	2016	0.834	2.3613	21.292	3.5054
					2016	3.27	6.5159	63.4781	3.2391	2016	2.6276	6.9882	22.7193	5.2144	2016	0.8304	1.4545	26.6816	2.4085
					2016	4.5107	7.2389	59.017	3.1479	2016	1.7207	3.7865	27.7823	7.5284	2016	0.3881	2.7416	27.4464	2.35
					2016	2.7774	16.6137	40.858	3.2254	2016	1.8752	2.1556	34.235	3.677	2016	0.6333	1.6266	20.9814	3.3
					2016	6.4581	8.132	52.299	2.1057	2016	1.9353	7.2296	22.6241	7.9737	2016	0.8803	2.3817	27.4982	1.0534
					2016	2.064	8.7274	64.067	2.044	2016	1.317	3.3041	30.3895	4.9133	2016	1.0839	2.1757	24.6867	1.8986
					2016	5.5138	9.4062	52.4871	4.3415	2016	1.3959	3.7347	33.3263	4.8014	2016	0.7922	1.7828	18.6412	5.1339
					2016	1.4526	13.2455	49.0365	2.7868	2016	0.6833	4.9649	30.4624	7.5151	2016	0.427	1.3705	28.1817	2.2391
					2016	2.8101	8.7219	47.559	3.4902	2016	1.7101	2.8008	31.2997	8.4464	2016	1.3827	1.876	16.8792	3.6981
					2016	6.928	13.4753	45.9757	2.7682	2016	1.4929	5.0305	33.6801	5.7154	2016	1.5844	2.3346	19.8758	2.5463
					2016	2.0265	13.8849	53.6236	1.5964	2016	0.8328	6.6726	20.7104	5.5569	2016	0.4342	3.1699	22.841	3.0072
					2016	2.9681	11.6696	53.5887	2.9275	2016	2.2806	2.6662	33.1213	7.375	2016	0.6571	1.5268	27.8011	1.4682
					2016	3.8187	16.3287	38.1358	3.9774	2016	1.3797	4.0334	26.4291	6.2393	2016	1.4668	2.4238	21.2064	1.9735
					2016	3.7153	8.7942	58.7846	2.9338	2016	1.952	6.0544	28.5863	5.43	2016	0.7522	1.2995	27.5734	1.7598
					2016	2.9739	8.0136	62.2845	3.1122	2016	1.5203	4.784	30.9612	5.2699	2016	0.8481	1.4412	26.562	2.5031
					2016	1.5164	11.2124	57.8789	3.3133	2016	1.0212	5.4155	23.9121	7.9932	2016	0.3925	2.3049	26.6577	1.6265
					2016	4.9627	6.275	59.5099	3.6984	2016	1.3407	4.866	34.0258	4.9954	2016	0.6635	2.2359	22.0664	2.1444
					2016	1.9063	6.2431	66.7506	1.4632	2016	1.0246	4.0164	33.0615	6.8839	2016	0.6069	2.7694	19.4878	3.4399
					2016	3.2451	9.0579	59.2423	2.9643	2016	1.6057	2.7536	30.3548	6.4109	2016	0.4541	1.9124	27.3229	1.6867
					2016	4.4866	8.4415	58.2269	2.4518	2016	1.4116	4.9224	31.3573	3.4351	2016	0.4604	1.8236	18.6529	3.4745
					2016	2.6869	6.0359	50.3981	3.7645	2016	1.0279	4.1493	29.6364	6.6863	2016	0.475	1.179	25.7966	1.8532
					2016	4.9894	11.4256	45.9075	3.5883	2016	1.4405	4.6944	29.2464	4.7774	2016	1.4838	1.5437	18.3719	3.3938
					2016	2.7433	7.5401	49.0025	3.8209	2016	2.4906	5.9802	29.6898	6.4715	2016	0.3548	1.8688	18.0782	3.2748
					2016	3.5229	8.5595	48.5757	3.8553	2016	1.1207	3.1001	33.1383	7.6745	2016	0.6646	1.138	26.9053	2.343
					2016	3.4104	14.2973	40.9607	3.5473	2016	1.4163	2.8446	29.3504	7.7745	2016	0.4703	2.339	22.9002	2.7471
					2016	1.5135	11.0199	47.0321	4.5462	2016	2.1012	7.1837	29.4137	6.1833	2016	0.6976	2.5225	25.5237	1.2737
					2016	2.6928	7.0957	59.0199	3.1652	2016	1.0669	3.0876	34.6712	4.0413	2016	0.2223	0.6755	22.9657	3.9
					2016	7.3091	11.7591	33.1459	3.9665	2016	1.5933	6.5243	34.0166	4.0169	2016	0.8046	1.6524	31.559	1.1884
					2016	1.7499	8.5806	47.7428	2.7275	2016	1.8144	4.0625	19.8739	8.5986	2016	1.3254	2.2003	15.5401	5.8282
					2016	2.577	9.2056	55.4779	3.5253	2016	1.0245	3.9232	34.0581	4.3788	2016	0.4299	2.4024	29.0338	1.1245
					2016	4.2507	8.5981	58.3194	2.1528	2016	2.2966	3.3091	33.9168	7.6982	2016	0.6958	1.5802	23.2151	2.6008
					2016	3.6591	9.1625	51.1331	4.0918	2016	2.8188	5.0149	31.4177	5.769	2016	0.4551	4.1749	20.6166	3.1815
					2016	1.8721	9.5992	50.9624	3.5521	2016	1.4889	4.719	36.368	5.8348	2016	0.4434	1.8359	30.6109	1.1176
					2016	4.2342	5.811	55.2086	3.1761	2016	1.3413	5.391	23.7658	7.6424	2016	0.4797	2.4405	26.2513	1.4422
					2016	2.2395	8.2418	50.0554	3.9403	2016	0.9609	5.9758	28.2562	4.685	2016	0.6644	1.392	27.421	2.1159
					2016	3.1709	7.0751	38.4349	5.5263	2016	1.0147	1.9794	28.8238	6.5452	2016	0.9216	3.2378	23.6588	1.708
					2016	2.371	5.9075	48.6497	6.2557	2016	2.4398	3.7753	32.2246	4.9573	2016	0.7722	3.441	12.901	3.5572
					2016	1.8448	15.6671	37.575	4.5561	2016	1.6992	5.3369	34.7771	4.0703	2016	1.0554	3.6303	19.5844	2.0041
					2016	4.0564	9.9183	40.0176	5.0824	2016	2.3183	5.6334	35.9684	5.3349	2016	1.7556	2.0005	21.31	2.1503
					2016	1.0164	13.6293	54.9449	3.2794	2016	1.1307	2.8256	29.293	6.6783	2016	0.6692	2.166	24.7434	2.905
					2016	4.2665	6.1203	61.9805	3.132	2016	1.922	5.0854	36.0226	5.0793	2016	0.8437	0.712	27.1473	1.922
					2016	5.9914	10.4318	45.4685	3.6601	2016	1.9769	4.6742	31.7319	5.0333	2016	0.995	3.4367	23.9201	1.2483
					2016	4.2454	9.1808	47.6984	4.6383	2016	1.554	3.5866	31.0895	6.2198	2016	0.8794	2.475	21.9584	1.9243
					2016	2.5383	8.3219	56.1814	2.9627	2016	2.8821	4.6248	34.0641	3.4897	2016	1.1261	2.4384	18.4595	3.2945
					2016	4.2177	13.5023	51.2141	3.2809	2016	0.409	5.2426	26.361	6.6445	2016	0.7104	2.3241	22.5311	2.8314
					2016	4.2777	7.5074	58.3444	2.5903	2016	1.5062	2.7135	35.0279	6.385	2016	0.2996	1.095	30.5757	1.5101
					2016	2.7799	9.174	57.4405	3.3516	2016	0.9957	5.9333	28.7601	7.6279	2016	0.5207	2.1489	27.6944	1.8925
					2016	2.993	4.7514	51.3549	4.5502	2016	0.6791	6.5398	36.1311	3.8946	2016	0.592	2.9089	20.691	2.3635
					2016	0.9014	12.8704	57.9408	3.3041	2016	1.107	1.8027	35.2352	5.5301	2016	1.11	2.7803	23.8908	2.1592
					2016	2.4306	10.7053	45.9606	4.0431	2016	0.8152	3.9914	33.7074	5.4069	2016	0.7372	3.5088	19.0196	3.5675
					2016	4.6989	8.3473	50.4616	2.6702	2016	1.9018	4.3383	21.6578	8.6761	2016	0.7439	2.9358	22.2279	2.0431
					2016	3.5722	11.46	50.2231	2.7027	2016	2.0804	5.5503	30.8968	5.4105	2016	0.8048	2.7058	22.736	1.5245
					2016	2.6054	5.8887	53.2917	3.809	2016	1.4394	6.5125	27.6775	6.1066	2016	0.506	2.6446	22.6111	2.6374
					2016	2.7071	4.1478	63.9145	4.1573	2016	1.8183	5.7548	28.3968	4.7368	2016	1.077	2.6013	25.5271	2.4491
					2016	4.6033	11.8734	39.749	5.4435	2016	1.0336	2.7836	33.1794	6.429	2016	0.4469	0.9712	24.7735	3.0812
					2016	1.8903	10.6419	50.4363	3.8276	2016	1.0768	3.1958	28.3591	6.3749	2016	1.1608	2.8822	22.9508	2.0197
