# Supplementary material for: Scaling the effects of ocean acidification on coral growth and coral–coral competition on coral community recovery
Source: PeerJ. 2021 Jul 13;9:e11608. doi: 10.7717/peerj.11608 (PMC8284307; doi:10.7717/peerj.11608)
Supplement: Supplemental Information 6 — Changes in total coral cover relative to baseline cover under ambient conditions, as a function of ±20% changes in key model parameters. [file peerj-09-11608-s006.xlsx]

## Sheet: Sheet1
Short-term	20% decrease	20% increase	% decrease change	% increase change
Baseline cover	67.1
Growth	50.7	79.9	-24.4411	19.076
Recruitment	57.3	73.3	-14.6051	9.23994
Competition	60.6	75	-9.68703	11.7735
Whole	63.9	68.6	-4.769	2.23547
Partial	66	67.5	-1.63934	0.596125
